# Supplementary material
Source: MDPI journal article supplement (https://www.mdpi.com/2218-2004/3/1/2)
Supplement: s1 [file s1]

## Sheet: Sheet1
LL.	UL.		λ (Å)		A_L		A_V		f_L		f_V		S_L
1	5		132.939		19100000000		15500000000		0.152		0.123		0.0664
	13		11.036		4990000000000		5300000000000		0.273		0.29		0.0105
	15		10.997		7940000000000		7440000000000		0.432		0.405		0.0156
	22		10.691		191000000000		261000000000		0.00982		0.0134		0.000346
	36		10.369		124000000000		120000000000		0.00597		0.0058		0.000204
	41		10.246		5110000000		4790000000		0.000241		0.000226		8.14e-06
	46		10.172		416000000000		421000000000		0.0194		0.0196		0.000648
	49		8.326		1200000000000		1110000000000		0.0373		0.0347		0.00102
	52		8.314		4990000000000		4690000000000		0.155		0.146		0.00424
	75		8.007		19200000000		18400000000		0.000555		0.00053		1.46e-05
	84		7.937		2400000000		2330000000		6.79e-05		6.6e-05		1.77e-06
	95		7.921		193000000000		185000000000		0.00544		0.00522		0.000142
	99		7.486		585000000000		464000000000		0.0147		0.0117		0.000363
	102		7.48		3250000000000		2530000000000		0.0818		0.0638		0.00202
	143		7.188		1330000000		1090000000		3.1e-05		2.52e-05		7.33e-07
	152		7.182		99400000000		84500000000		0.00231		0.00196		5.45e-05
2	7		147.922		6310000000		4590000000		0.0621		0.0452		0.022
	11		11.705		385000000000		332000000000		0.0237		0.0204		0.000914
	17		11.321		13000000000000		13000000000000		0.747		0.751		0.028
	23		10.995		807000000000		1050000000000		0.0439		0.057		0.00206
	27		10.913		3100000000000		3230000000000		0.166		0.173		0.00621
	30		10.804		614000000000		451000000000		0.0322		0.0237		0.000842
	34		10.776		140000000000		71500000000		0.00733		0.00374		0.000133
	47		8.627		189000000000		121000000000		0.00634		0.00405		0.000115
	54		8.54		4190000000000		4090000000000		0.138		0.134		0.00377
	65		8.299		830000000000		807000000000		0.0257		0.025		0.000683
	76		8.28		1940000000000		1850000000000		0.0599		0.0569		0.00155
	79		8.206		22600000000		21800000000		0.000685		0.000659		1.78e-05
	97		8.15		58300000		2450000		1.74e-06		7.33e-08		1.97e-09
	118		7.463		550000000000		457000000000		0.0138		0.0114		0.000281
3	6		172.469		12100000000		7630000000		0.0179667		0.0113333		0.0306
	8		143.72		4051700000		5305290000		0.00989357		0.0129546		0.0821408
	11		11.736		1170000000000		964000000000		0.0242667		0.0199		0.00231
	17		11.35		9510000000000		9420000000000		0.182		0.180278		0.0204
	18		11.3478		17131900000000		17034000000000		0.0205924		0.0204748		1.64421
	20		11.2568		108513000000		104882000000		0.000127319		0.000123059		0.00996203
	23		11.022		2080000000000		1720000000000		0.0313667		0.0259378		0.00341
	26		10.9458		4154400000000		3704560000000		0.00448147		0.0039962		0.332699
	27		10.94		930000000000		1020000000000		0.0183667		0.0201441		0.00199
	28		10.89		8090000000000		7400000000000		0.048		0.0436667		0.00515
	30		10.83		2070000000000		2100000000000		0.037		0.0375362		0.00395
	37		10.7269		242829000000		240204000000		0.000246545		0.00024388		0.0207181
	44		10.626		120000000000		98300000000		0.000676667		0.000553333		7.08e-05
	48		8.622		55400000000		41900000000		0.000205667		0.000155667		1.75e-05
	53		8.55747		5465010000000		5625770000000		0.00281705		0.00289992		0.30881
	54		8.556		2970000000000		3060000000000		0.0336667		0.0346869		0.00284
	56		8.53991		33369500000		34525700000		1.70953e-05		1.76876e-05		0.00188741
	64		8.29595		2374780000000		2488040000000		0.0011153		0.00116849		0.128354
	65		8.295		1320000000000		1460000000000		0.0151333		0.0167384		0.00124
	76		8.221		703000000000		759000000000		0.00783333		0.00845733		0.000641
	79		8.213		566000000000		550000000000		0.00556667		0.00540931		0.000453
	80		8.19992		279793000000		281761000000		0.000126892		0.000127784		0.014201
	82		8.183		622000000000		596000000000		0.00208		0.00199667		0.000168
	103		7.68773		2439950000000		2700700000000		0.00091189		0.00100934		0.119644
	105		7.68115		17015900000		18749300000		6.3431e-06		6.98927e-06		0.000829193
	118		7.475		732000000000		919000000000		0.0077		0.00966708		0.000568
	120		7.46872		1200360000000		1410670000000		0.000411357		0.000483427		0.0589843
	121		7.468		403000000000		503000000000		0.0042		0.00524218		0.00031
	137		7.402		256000000000		253000000000		0.00208333		0.00205892		0.000152
	140		7.39529		177256000000		190859000000		5.89703e-05		6.34957e-05		0.00782419
4	11		11.8666		1620180000000		2008940000000		0.102609		0.12723		0.00400851
	17		11.4717		620381000000		624995000000		0.0367186		0.0369917		0.00138671
	18		11.4698		5535830000000		5569790000000		0.545903		0.549252		0.0206131
	20		11.3769		19020600000		20210200000		0.0018454		0.00196082		6.91171e-05
	29		10.941		525288000000		416170000000		0.0282802		0.0224055		0.00101862
	34		10.9124		5714170000000		5715250000000		0.306027		0.306085		0.0109938
	53		8.6267		1807800000000		1761000000000		0.100846		0.098235		0.002864
	54		8.62566		201155000000		197966000000		0.00673107		0.00662438		0.000191138
	56		8.60885		17045600000		13913800000		0.000946937		0.000772953		2.68372e-05
	76		8.28458		683836000000		682285000000		0.0211087		0.0210609		0.000575709
	77		8.28155		2289150000000		2247370000000		0.117683		0.115535		0.00320847
	79		8.27636		2476860000000		2224370000000		0.0763045		0.068526		0.00207903
	80		8.26346		716676000000		732616000000		0.036683		0.0374989		0.000997924
	93		7.744		98000000000		89000000000		0.00264		0.0024		6.73e-05
	103		7.74256		862202000000		782378000000		0.0387532		0.0351654		0.000987913
	104		7.74212		97962500000		89402600000		0.00264088		0.00241012		6.73099e-05
	105		7.73688		8831910000		7771950000		0.000396282		0.000348722		1.00935e-05
	121		7.52		470734000000		421287000000		0.0117629		0.0105273		0.00028865
	136		7.45409		1304330000000		1149510000000		0.0543245		0.0478763		0.00133309
	137		7.45049		1457320000000		1113390000000		0.0363825		0.0277961		0.000892376
	140		7.44693		435528000000		401781000000		0.0181046		0.0167017		0.00044385
	154		7.431		9062130000		2606520000		2.56024e-05		7.36394e-06		2.36181e-06
5	8		314.333		275879000		348680000		0.00704783		0.00890767		0.0258241
	9		221.194		3719320000		4429990000		0.0331093		0.0394357		0.162468
	17		11.858		183000000000		184000000000		0.00386667		0.0038878		0.000454
	18		11.8559		108007000000		108191000000		0.000148055		0.000148307		0.0113993
	20		11.7566		16355000000000		16067400000000		0.0218608		0.0214764		1.66467
	23		11.501		1360000000000		1250000000000		0.0248		0.0227941		0.00282
	26		11.4178		352506000000		431517000000		0.0004316		0.00052834		0.0421679
	27		11.411		1490000000000		1330000000000		0.0259		0.0231188		0.00292
	28		11.357		243000000000		248000000000		0.00156667		0.0016		0.000176
	30		11.292		3380000000000		3130000000000		0.0596667		0.0552535		0.00666
	34		11.261		336000000000		302000000000		0.00573333		0.00515317		0.000638
	35		11.2597		2037850000000		2225970000000		0.00239287		0.00261375		0.211538
	37		11.1799		6841520000000		7632390000000		0.00786373		0.00877277		0.715074
	44		11.07		7530000000000		7260000000000		0.046		0.0443333		0.00504
	47		8.935		9400000000		12300000000		0.000147333		0.000192787		1.3e-05
	48		8.912		1050000000000		833000000000		0.00416667		0.00330667		0.000366
	53		8.84328		14378300000		14334200000		8.17927e-06		8.1542e-06		0.00084027
	54		8.842		65400000000		66300000000		0.000776667		0.000787355		6.79e-05
	56		8.82452		6250100000000		6358260000000		0.00353287		0.003594		0.371141
	64		8.56428		447065000000		461846000000		0.000230999		0.000238637		0.025392
	65		8.563		283000000000		353000000000		0.0039		0.00486466		0.000329
	76		8.484		1630000000000		1950000000000		0.021		0.0251227		0.00176
	77		8.48094		804353000000		827807000000		0.000403593		0.000415363		0.0446308
	79		8.476		464000000000		568000000000		0.0061		0.00746724		0.000512
	80		8.46198		2284150000000		2351520000000		0.00113843		0.00117201		0.126215
	82		8.444		2280000000000		2740000000000		0.00813333		0.00976667		0.000677
	89		8.43248		10700100000		12347400000		5.2774e-06		6.0899e-06		0.00065812
	93		8.425		59500000		56300000		6e-07		5.67731e-07		4.98e-08
	94		8.42451		17323900000		21628000000		8.5201e-06		1.06369e-05		0.00115059
	103		7.91761		3167820000		3507740000		1.29333e-06		1.43211e-06		0.000164829
	105		7.91063		3108360000000		3310600000000		0.0012657		0.00134805		0.155291
	120		7.6855		300538000000		350178000000		0.000112223		0.000130759		0.0155042
	121		7.684		109000000000		189000000000		0.00167333		0.00290147		0.000127
	136		7.61524		396133000000		461317000000		0.000143899		0.000167578		0.0200533
	140		7.60777		1094010000000		1268980000000		0.00039624		0.000459617		0.0550539
6	22		11.906		1090000000000		902000000000		0.0693		0.0575		0.00272
	25		11.69		40300000000		35800000000		0.00248		0.0022		9.53e-05
	36		11.508		21400000000000		21200000000000		1.27		1.26		0.0483
	41		11.357		31000000000		32500000000		0.0018		0.00189		6.73e-05
	46		11.266		443000000000		454000000000		0.0253		0.0259		0.000937
	69		8.678		6910000000000		5510000000000		0.234		0.187		0.00533
	75		8.669		123000000000		111000000000		0.00416		0.00376		0.000119
	84		8.588		2260000000		1950000000		7.49e-05		6.45e-05		2.12e-06
	95		8.569		562000000000		511000000000		0.0186		0.0169		0.000523
	152		7.71		335000000000		309000000000		0.00895		0.00827		0.000227
7	21		12.025		2870000000000		2540000000000		0.0207333		0.0183333		0.00218
	22		12.012		570000000000		496000000000		0.0141734		0.0123333		0.00146
	24		11.8574		1013900000000		1131830000000		0.035618		0.0397607		0.00465622
	25		11.792		120000000000		104000000000		0.00289231		0.00250667		0.000292
	29		11.7069		243552000000		244873000000		0.00834017		0.00838537		0.000969523
	33		11.6314		12677400000000		12702600000000		0.42854		0.42939		0.0493261
	36		11.607		4530000000000		4520000000000		0.0915354		0.0913333		0.0105
	38		11.5114		10784100000000		10782700000000		0.357057		0.35701		0.0405881
	41		11.453		11700000000000		11700000000000		0.229667		0.229667		0.026
	42		11.4524		2070970000000		2066280000000		0.067868		0.0677143		0.00765895
	43		11.438		16000000000000		16200000000000		0.104333		0.105667		0.0119
	46		11.361		251000000000		251000000000		0.00486667		0.00486667		0.000546
	52		9.091		15900000		16000000		1.95106e-07		1.96333e-07		1.76e-08
	57		9.0408		9090220		8811870		1.85646e-07		1.79961e-07		1.60686e-08
	66		8.75362		67430900000		65905900000		0.00129101		0.00126182		0.000109088
	67		8.74097		5402200000000		5607130000000		0.10313		0.107043		0.00924077
	69		8.734		1240000000000		1220000000000		0.0144667		0.0142333		0.00123
	71		8.72915		618178000000		493647000000		0.0117694		0.00939847		0.000810254
	81		8.65372		2273430000000		2296770000000		0.0425387		0.0429753		0.00367295
	84		8.643		4420000000000		4370000000000		0.0502349		0.0496667		0.00423
	85		8.6416		953863000000		979636000000		0.017798		0.0182789		0.00156004
	88		8.637		5660000000000		5520000000000		0.0211		0.0205667		0.00175
	95		8.623		144000000000		141000000000		0.00163745		0.00160333		0.000136
	122		7.84407		47892100000		51677700000		0.000736283		0.00079448		6.15484e-05
	124		7.83842		2825830000000		3138380000000		0.043381		0.0481793		0.00372975
	125		7.837		553000000000		495000000000		0.00569758		0.0051		0.000394
	141		7.76517		949581000000		1045550000000		0.0143064		0.0157522		0.00120805
	143		7.761		2290000000000		2050000000000		0.0230489		0.0206333		0.00158
	144		7.76058		478890000000		534909000000		0.00720643		0.0080494		0.000616951
	149		7.756		3100000000000		2840000000000		0.00933333		0.00853333		0.000654
	152		7.754		91900000000		81000000000		0.000941691		0.00083		6.35e-05
	153		7.75419		355652000		392376000		5.3431e-06		5.89483e-06		4.51441e-07
8	22		12.0731		1286550000000		1364370000000		0.00335215		0.00355491		0.0894414
	24		11.9169		1969020000000		1765860000000		0.209601		0.187974		0.00822292
	25		11.8505		110814000000		101665000000		0.000273052		0.000250509		0.00642118
	29		11.7649		1595720000000		1601210000000		0.165559		0.166129		0.00641228
	31		11.6986		6836220000000		6879520000000		0.981808		0.988027		0.037812
	33		11.6886		1553350000000		1563490000000		0.15908		0.160118		0.00612137
	36		11.664		183618000000		182436000000		0.000431418		0.000428642		0.0111629
	38		11.5675		2149470000000		2162820000000		0.215589		0.216928		0.00820984
	40		11.5262		23039800000000		23145500000000		3.21217		3.22691		0.121886
	41		11.5081		5612540000000		5611260000000		0.0126653		0.0126624		0.334226
	42		11.5079		11290600000000		11273200000000		1.1208		1.11907		0.0424616
	45		11.4193		2190910000000		2236420000000		0.299815		0.306043		0.011271
	46		11.4154		13958400000		15959100000		3.07429e-05		3.51493e-05		0.000935311
	57		9.07535		7034280		7096230		4.34275e-07		4.38099e-07		1.29747e-08
	66		8.786		808359000000		784790000000		0.046774		0.0454103		0.0013529
	67		8.77326		1019550000000		887274000000		0.058823		0.0511915		0.00169894
	68		8.76621		4565080000000		4516380000000		0.368144		0.364217		0.0106243
	69		8.7661		111127000000		118449000000		0.000110835		0.000118138		0.00409366
	81		8.68537		950475000000		901510000000		0.0537447		0.050976		0.00153672
	83		8.67521		6624880000000		6529570000000		0.52322		0.515693		0.0149429
	84		8.67416		1919950000000		1956250000000		0.00185529		0.00189038		0.0661988
	85		8.67316		3651430000000		3665080000000		0.20589		0.20666		0.00587873
	96		8.65391		206204000000		210863000000		0.0162057		0.0165719		0.000461691
	122		7.87007		392126000000		362872000000		0.0182054		0.0168472		0.000471683
	124		7.86438		304085000000		268486000000		0.0140975		0.0124471		0.000364986
	125		7.8628		55271800000		71916400000		3.9781e-05		5.17607e-05		0.00199964
	129		7.85991		2739200000000		2539800000000		0.177585		0.164658		0.00459508
	131		7.85583		5665860000		5188330000		0.000366941		0.000336014		9.48984e-06
	141		7.79064		487833000000		447006000000		0.022194		0.0203366		0.000569219
	143		7.78692		881116000000		992680000000		0.000615986		0.00069398		0.0270714
	146		7.78491		3191660000000		2925760000000		0.202988		0.186077		0.00520228
	157		7.77793		478035000		448474000		3.03483e-05		2.84716e-05		7.77086e-07
	159		7.7765		47391100000		42945500000		0.00300754		0.00272541		7.69956e-05
	161		7.77601		10247600000		9309810000		0.000650249		0.000590743		1.66459e-05
9	24		12.1102		512008000000		462240000000		0.0562856		0.0508145		0.00224398
	25		12.0417		2256110000000		2292160000000		0.00583258		0.00592578		0.149482
	29		11.9533		801720000000		791725000000		0.0858652		0.0847948		0.00337891
	31		11.8848		216371000000		222815000000		0.0320722		0.0330274		0.00125485
	33		11.8746		1830170000000		1816150000000		0.19344		0.191958		0.00756195
	36		11.8492		34713400000		36326700000		8.55066e-05		8.94803e-05		0.00229387
	38		11.7495		2422740000000		2392180000000		0.250707		0.247545		0.00969744
	40		11.707		1597040000000		1588140000000		0.229695		0.228415		0.00885254
	41		11.6883		1513030000000		1505040000000		0.00357721		0.00355832		0.0924745
	42		11.6881		7195290000000		7195260000000		0.736806		0.736804		0.0283509
	45		11.5967		34391700000000		34768900000000		4.85367		4.9069		0.1853
	46		11.5926		981244000000		1006170000000		0.00226341		0.00232091		0.0608144
	52		9.23884		4446510000		34597100000		5.19173e-06		4.03954e-05		0.00132814
	57		9.18704		1708650		1778570		1.08099e-07		1.12522e-07		3.26941e-09
	58		9.18219		216262000		165338000		1.91346e-05		1.46289e-05		5.7841e-07
	59		9.17695		8241700000		6444900000		0.000728383		0.000569586		2.20054e-05
	66		8.89064		186639000000		190224000000		0.0110583		0.0112707		0.000323661
	67		8.87759		26082500000		33306800000		0.00154084		0.00196762		4.50323e-05
	68		8.87037		502306000000		506273000000		0.0414761		0.0418037		0.00121119
	69		8.87026		34758900000		44897400000		3.59183e-05		4.63949e-05		0.00158878
	71		8.8654		487602000000		398746000000		0.0287264		0.0234915		0.000838397
	81		8.78761		1056290000000		1046790000000		0.0611423		0.0605927		0.00176882
	83		8.77721		309095000000		299634000000		0.0249891		0.0242242		0.000722068
	84		8.77614		501579000000		498432000000		0.000501984		0.000498835		0.0172656
	85		8.77511		2715320000000		2664420000000		0.156727		0.153789		0.00452759
	95		8.75628		331902000000		364804000000		0.00032992		0.000362626		0.0125796
	96		8.75541		12354100000000		12278800000000		0.993823		0.987766		0.0286455
	122		7.95393		83164500000		81021200000		0.00394383		0.0038422		0.000103269
	124		7.94811		59177100000		59980600000		0.0028022		0.00284025		7.3322e-05
	129		7.94355		457979000000		428949000000		0.0303264		0.0284041		0.00079306
	131		7.93938		1049580000		935842000		6.9428e-05		6.19044e-05		1.81465e-06
	141		7.8728		506000000000		475278000000		0.0235086		0.0220813		0.000609294
	143		7.86901		227997000000		234169000000		0.000164486		0.000168939		0.00652136
	146		7.86695		132139000000		122879000000		0.00858203		0.00798062		0.000222263
	157		7.85983		5003120000		4588000000		0.000324349		0.000297437		8.3926e-06
	159		7.85836		6049130000000		5610520000000		0.392015		0.363591		0.0101416
	161		7.85786		452259000000		419224000000		0.029305		0.0271644		0.000758083
10	22		12.614		28000000000		25600000000		0.002		0.00183		8.32e-05
	25		12.371		936000000000		898000000000		0.0644		0.0618		0.00262
	36		12.168		347000000000		335000000000		0.0231		0.0223		0.000927
	41		11.999		175000000000		175000000000		0.0113		0.0113		0.000447
	46		11.898		20000000000000		20000000000000		1.27		1.27		0.0499
	49		9.447		23600000000		21500000000		0.000948		0.000863		2.95e-05
	52		9.432		119000000000		89800000000		0.00476		0.00359		0.000148
	75		9.038		416000000000		288000000000		0.0153		0.0106		0.000455
	84		8.95		89200000000		88300000000		0.00321		0.00318		9.47e-05
	95		8.929		6600000000000		6720000000000		0.237		0.241		0.00696
	125		8.089		444000000000		351000000000		0.0131		0.0103		0.000348
	143		8.008		49800000000		44300000000		0.00144		0.00128		3.79e-05
	152		8.001		3340000000000		3010000000000		0.0962		0.0866		0.00253
	170		5.933		3410000000		3700000000		5.4e-05		5.86e-05		1.05e-06
11	29		148.179		4552800		4045990		7.49327e-05		6.65914e-05		3.65536e-05
	33		136.923		137694000		115785000		0.00193501		0.00162713		0.000872229
	36		133.619		22900000		24700000		0.000198		0.000213563		8.73e-05
	38		121.958		29643000		24764700		0.000330493		0.000276105		0.000132692
	41		115.671		92100000		93400000		0.000562		0.000569933		0.000214
	42		115.648		123136000		115707000		0.00123445		0.00115998		0.000469983
	43		114.161		95500000		96100000		0.000187		0.000188		7.02e-05
	46		106.935		15000000		17400000		8.96e-05		0.000103936		3.16e-05
	49		32.101		752000000000		713000000000		0.33		0.312886		0.0349
	51		31.9495		852056000000		897351000000		0.651951		0.686609		0.0685725
	52		31.92		165000000000		156000000000		0.0714		0.0675055		0.0075
	57		31.3099		652170		665585		4.79228e-07		4.89086e-07		4.93964e-08
	69		27.913		2810000000		3180000000		0.00112		0.00126747		0.000103
	81		27.1103		473086000		431123000		0.000260632		0.000237514		2.32613e-05
	84		27.001		9310000000		9740000000		0.00319		0.00333734		0.000284
	85		26.9917		7178960000		6622950000		0.00392047		0.00361683		0.000348368
	88		26.947		12900000000		13100000000		0.0014		0.00143		0.000124
	95		26.814		1230000000		1330000000		0.000431		0.000466041		3.8e-05
	99		22.407		438000000000		427000000000		0.0964		0.093979		0.00711
	100		22.379		556000000000		532000000000		0.0417		0.04		0.00308
	101		22.3662		494594000000		508401000000		0.18546		0.190637		0.0136556
	102		22.356		75200000000		73300000000		0.0165		0.0160831		0.00121
	110		22.2114		303400		309189		1.12198e-07		1.14339e-07		8.20415e-09
	116		20.695		155000000		197000000		3.8e-05		4.82968e-05		2.59e-06
	122		20.486		227334000		229321000		7.15149e-05		7.21399e-05		4.82308e-06
	124		20.4475		4277790000		4342080000		0.00134065		0.0013608		9.02458e-05
	125		20.437		1740000000		1750000000		0.000328		0.000329885		2.21e-05
	134		20.153		27000000		28500000		5.21e-06		5.49944e-06		3.46e-07
	141		19.9563		177427000		177172000		5.29664e-05		5.28903e-05		3.47978e-06
	143		19.932		5360000000		5400000000		0.000964		0.000971194		6.33e-05
	144		19.9261		3839690000		3805070000		0.00114277		0.00113246		7.49635e-05
	149		19.896		8310000000		8210000000		0.000493		0.000487		3.23e-05
	152		19.885		813000000		822000000		0.000146		0.000147616		9.57e-06
	153		19.884		38422.7		39154		1.13871e-08		1.16039e-08		7.45399e-10
	167		10.795		7850000000000		10900000000000		0.137		0.191		0.00487
	178		10.5227		43322400		81676800		3.59571e-06		6.77908e-06		1.24561e-07
12	22		260.791		732000000		594000000		0.0224		0.0182		0.0192
	25		185.516		7490000000		7100000000		0.116		0.11		0.0708
	49		32.887		161000000000		154000000000		0.0782		0.0751		0.00847
	52		32.697		666000000000		632000000000		0.32		0.304		0.0345
	61		29.522		456000000		415000000		0.000179		0.000163		1.74e-05
	84		27.555		179000000		154000000		6.1e-05		5.27e-05		5.54e-06
	95		27.36		11800000000		11400000000		0.00398		0.00383		0.000359
	99		22.787		79500000000		66500000000		0.0186		0.0155		0.00139
	102		22.735		433000000000		360000000000		0.101		0.0836		0.00753
	116		21.019		124000000		1740000		2.46e-05		3.46e-07		1.7e-06
	125		20.753		5650000000		4280000000		0.00109		0.000829		7.47e-05
	143		20.232		100000000		87100000		1.84e-05		1.6e-05		1.23e-06
	152		20.184		6640000000		6080000000		0.00122		0.00111		8.09e-05
	186		10.88		125000000000		149000000000		0.00665		0.00793		0.000238
	170		10.741		5170000000000		6280000000000		0.268		0.326		0.00948
13	35		174.866		1855310000		2900190000		0.0244807		0.0382677		0.0664746
	37		157.412		105952000		131819000		0.00101979		0.00126877		0.00244835
	47		34.693		142000000000		149000000000		0.0805		0.0844683		0.0092
	48		34.352		266000000000		236000000000		0.0471		0.0418		0.00533
	53		33.3484		1097990000000		1061990000000		0.100487		0.0971931		0.885299
	54		33.333		526000000000		511000000000		0.255		0.247728		0.028
	56		33.0832		570368000000		557293000000		0.0509645		0.0497962		0.457212
	64		32.5161		799495000000		806482000000		0.0678263		0.068419		0.639158
	72		29.2179		13659900000		13585000000		0.000840777		0.00083617		0.00869311
	79		28.758		9080000000		9870000000		0.00367		0.00398931		0.000348
	82		28.299		13800000000		12000000000		0.00166		0.00144		0.000155
	89		28.1728		9173490000		9822460000		0.000506187		0.000541996		0.00584382
	97		28.091		5510000000		5800000000		0.00206		0.00216842		0.00019
	103		23.1445		554045000000		573560000000		0.0169502		0.0175472		0.230299
	104		23.448		65000000000		86000000000		0.0213		0.0281815		0.00164
	105		23.0849		289808000000		303090000000		0.00879797		0.0092012		0.121073
	118		21.322		1170000000		1200000000		0.000245		0.000251282		1.72e-05
	127		21.1426		5805430000		6554600000		0.000135393		0.000152865		0.00219624
	136		20.7375		1767120000		1766580000		3.88889e-05		3.8877e-05		0.000569462
	147		20.5899		3269960000		3956650000		7.0436e-05		8.52276e-05		0.00125735
	151		20.5669		2160180		270709		4.63755e-08		5.81167e-09		8.58343e-08
	154		20.562		2160000000		2580000000		0.000491		0.000586472		3.32e-05
	176		10.77		2100000000000		2110000000000		0.11		0.110524		0.0039
14	47		34.812		70800000000		84500000000		0.0386		0.0461		0.00442
	54		33.442		1140000000000		1130000000000		0.572		0.566		0.063
	97		28.169		11400000000		11900000000		0.00408		0.00423		0.000378
	106		23.184		571000000000		613000000000		0.138		0.148		0.0105
	118		21.366		747000000		74000000		0.000153		1.52e-05		1.08e-05
	176		10.782		4560000000000		4680000000000		0.239		0.245		0.00847
15	27		236.89		1510000000		1510000000		0.0381		0.0381		0.0297
	34		185.547		2420000000		2720000000		0.0422		0.0474314		0.0258
	35		185.128		530179000		458860000		0.00830094		0.00718431		0.0117881
	47		35.079		96400000000		98200000000		0.0543		0.0553139		0.00628
	48		34.73		431000000000		384000000000		0.0779		0.0694		0.0089
	53		33.7047		453030000000		437191000000		0.0428043		0.0413078		0.372281
	56		33.4339		1267050000000		1242620000000		0.116853		0.1146		1.04118
	65		30.228		18000000000		15600000000		0.00642		0.005564		0.000639
	72		29.491		1674000000		1733130000		0.000105953		0.000109696		0.00112987
	76		29.022		9430000000		5080000000		0.00119		0.000716		0.000341
	80		28.7647		6610570000		8047140000		0.000388244		0.000472615		0.00499089
	82		28.555		12700000000		7230000000		0.00156		0.000884		0.000146
	93		28.343		3170000000		3350000000		0.00121		0.00127871		0.000113
	94		28.3362		17042000000		17529500000		0.00095683		0.000984202		0.0105505
	97		23.623		43200000000		55800000000		0.014		0.0180833		0.00109
	103		23.3155		214260000000		220127000000		0.0067014		0.00688489		0.0896976
	105		23.2551		651405000000		679520000000		0.0202159		0.0210884		0.275458
	118		21.467		12100000000		9860000000		0.00204		0.00166235		0.000144
	120		21.4113		14815700000		12344700000		0.000358871		0.000299018		0.00424212
	121		21.402		6900000000		6150000000		0.00127		0.00113196		8.93e-05
	127		21.2852		657930000		735187000		1.56568e-05		1.74952e-05		0.000249673
	136		20.8747		2050470000		1875790000		4.60262e-05		4.21053e-05		0.000612696
	137		20.874		3640000000		3560000000		0.000699		0.000683637		4.8e-05
	140		20.8187		4713160000		5721460000		0.000104945		0.000127396		0.00185879
	151		20.7019		6341810000		7837020000		0.000138846		0.000171581		0.00251762
	154		20.697		1270000000		1500000000		0.000288		0.000340157		1.97e-05
	171		10.8787		6115190000000		4900330000000		0.0194282		0.0155685		0.434709
	176		10.807		1360000000000		1420000000000		0.0746		0.0778912		0.00265
16	26		242.993		1113840000		1154790000		0.0492982		0.0511103		0.0394364
	47		35.1481		421134000000		408643000000		0.233987		0.227048		0.0270747
	53		33.7688		500166000000		512039000000		0.427526		0.437675		0.0475279
	54		33.7528		56924700000		57343300000		0.0291669		0.0293814		0.00324094
	55		33.626		1943240000000		2073320000000		2.30581		2.46016		0.255252
	72		29.5401		1588760000		1636450000		0.0010392		0.00107039		0.000101061
	73		29.5394		284814000		277674000		0.000260802		0.000254263		2.5362e-05
	74		29.5012		15787700000		15365800000		0.0144193		0.014034		0.00140041
	79		29.0696		1002060000		1126020000		0.00038084		0.000427951		3.64462e-05
	89		28.4722		2281560000		2108200000		0.00138641		0.00128106		0.000129952
	91		28.4613		21064300		19893100		1.79062e-05		1.69105e-05		1.67776e-06
	94		28.3815		2318280000		2269510000		0.00139976		0.00137032		0.000130786
	97		23.6549		241906000000		185061000000		0.060878		0.0465724		0.00474081
	103		23.3462		259389000000		251299000000		0.105974		0.102669		0.00814491
	104		23.3331		29472600000		28723800000		0.00721659		0.00703323		0.000554338
	105		23.2856		2491110000		2418660000		0.00101248		0.000983026		7.76143e-05
	120		21.3107		791894000		679889000		0.000269576		0.000231448		1.89126e-05
	176		10.8137		5915310000000		5907130000000		0.311094		0.310664		0.0110748
17	38		188.72		986314000		891284000		0.0263312		0.0237942		0.0163591
	43		170.681		4240000000		7570000000		0.0185		0.033		0.0104
	46		155.02		103000000		97300000		0.00105		0.000991893		0.000537
	49		35.397		25200000000		29200000000		0.0164		0.0190032		0.00192
	51		35.2129		1378470000		1212550000		0.00128121		0.00112699		0.000148522
	52		35.177		5340000000		6070000000		0.00338		0.00384206		0.000391
	57		34.4375		3326360000000		3358230000000		2.957		2.98533		0.335239
	61		31.529		1130000000		1030000000		0.000459		0.000418381		4.76e-05
	62		31.515		4940000000		6400000000		0.000736		0.000953		7.64e-05
	71		30.3148		620672000		537768000		0.000427554		0.000370445		4.26694e-05
	75		30.26		65300000		69800000		2.87e-05		3.06778e-05		2.86e-06
	85		29.2845		2551190000		144950000		0.00163997		9.31776e-05		0.000158104
	88		29.232		647000000		6640000000		8.29e-05		0.000851		7.97e-06
	99		23.964		10700000000		13600000000		0.00351		0.00446131		0.000277
	100		23.932		54100000000		70700000000		0.00464		0.00607		0.000366
	102		23.907		1720000000		2240000000		0.000576		0.00075014		4.54e-05
	110		23.741		1151300000000		1152870000000		0.486412		0.487077		0.0380167
	116		22.017		670000000		710000000		0.000155		0.000164254		1.12e-05
	122		21.7802		13914900000		14852500000		0.00494794		0.00528132		0.000354779
	124		21.7367		1232170000		1342170000		0.00043639		0.000475348		3.12277e-05
	134		21.4187		28779700		33598200		9.89675e-06		1.15537e-05		6.97842e-07
	141		21.1825		1223290000		918335000		0.000411439		0.00030887		2.86915e-05
	180		10.854		7328550000000		6915240000000		0.647165		0.610667		0.0231247
18	31		231.709		417713000		441538000		0.0235347		0.024877		0.0179523
	33		227.876		115380000		126580000		0.00449103		0.00492696		0.00336911
	46		155.365		644954000		859902000		0.00358122		0.00477476		0.00933527
	49		35.4152		81356300000		95469100000		0.00535057		0.00627872		0.0538531
	51		35.2307		20144900000		17521200000		0.0187424		0.0163014		0.00217379
	52		35.1947		11888000000		12236300000		0.000767321		0.000789807		0.00681669
	57		34.4546		618613000000		622067000000		0.550466		0.55354		0.0624379
	58		34.3865		3527520000000		3531040000000		4.37714		4.38151		0.495505
	59		34.3131		45843800000		46039600000		0.0566431		0.056885		0.0063985
	68		30.3863		11316200000		11958300000		0.0109648		0.011587		0.00109686
	96		29.0784		1794830000		2228580000		0.00159261		0.00197749		0.000152458
	102		23.915		3767520000		3554530000		7.62971e-05		7.19839e-05		0.00091431
	110		23.7491		214207000000		213070000000		0.0905622		0.0900814		0.00708052
	111		23.7163		1247000000000		1244120000000		0.73605		0.73435		0.0574679
	112		23.6945		3587060000		3701270000		0.0021134		0.00218069		0.000164854
	116		22.0235		1615720000		1450370000		2.55544e-05		2.29391e-05		0.000316388
	129		21.7094		7293560000		7896520000		0.00360728		0.00390549		0.000257808
	134		21.4253		332062000		367401000		0.00011426		0.000126419		8.05917e-06
	135		21.4113		616477000		320941000		8.95951e-06		4.66436e-06		6.61727e-05
	141		21.189		1656510000		1970690000		0.000557482		0.000663218		3.88877e-05
	143		21.1615		450828000		8176470000		6.32544e-06		0.000114722		0.00164675
	179		10.823		8345860000000		8066230000000		1.02592		0.991546		0.036554
19	24		388.614		41257500		35366000		0.00467044		0.00400351		0.00597512
	29		273.45		23607.5		326097		1.32319e-06		1.82776e-05		1.19116e-06
	45		160.53		931088000		758065000		0.0251796		0.0205005		0.0133068
	57		34.6655		17830800000		17766100000		0.0160614		0.0160031		0.00183295
	58		34.5965		427287000000		429624000000		0.536698		0.539634		0.061127
	59		34.5223		15375500000		15219300000		0.0192298		0.0190344		0.00218547
	66		30.792		7089970		9133710		5.03891e-06		6.49143e-06		5.10793e-07
	110		23.8491		6174760000		6037990000		0.00263259		0.00257428		0.000206693
	111		23.816		153343000000		151992000000		0.0912746		0.0904701		0.00715633
	112		23.7941		2586210000		2469440000		0.00153655		0.00146717		0.000120361
	134		21.5067		1601330000		1863590000		0.000555197		0.000646125		3.93089e-05
	169		11.1315		212343000000		219969000000		0.0197227		0.020431		0.000722756
	178		10.8765		13438700000		13385700000		0.00119167		0.00118698		4.26696e-05
	179		10.8438		1915540000000		1910210000000		0.236372		0.235715		0.00843813
20	31		277.509		41024600		33082300		0.00331546		0.00267359		0.00302894
	42		199.217		142198000		124116000		0.00423024		0.00369232		0.00277436
	45		175.634		2269210000		1910030000		0.0734577		0.0618305		0.0424733
	52		36.0996		109799000000		140988000000		0.00764796		0.00982044		0.0826338
	57		35.3214		2938540000		2813440000		0.00274806		0.00263107		0.000319547
	58		35.2498		59636500000		59502500000		0.0777628		0.0775881		0.00902401
	59		35.1728		3820640000000		3821270000000		4.96016		4.96098		0.574345
	61		32.2684		1702300000		1420760000		8.46856e-05		7.06795e-05		0.000665343
	68		31.0585		16195300000		16810500000		0.0163944		0.0170172		0.00167628
	83		29.9456		1668290000		1786460000		0.00156994		0.00168114		0.00015477
	96		29.6934		24132600000		25357100000		0.022329		0.023462		0.00218272
	110		24.1578		982336000		918020000		0.000429726		0.000401591		3.41759e-05
	111		24.1238		6417770000		6200240000		0.00391943		0.00378658		0.000311271
	112		24.1013		1347250000000		1327710000000		0.821249		0.809338		0.0651607
	129		22.0503		13274900000		13766000000		0.00677338		0.00702396		0.000491689
	131		22.0182		35295600		29813800		1.79569e-05		1.5168e-05		1.30162e-06
	146		21.4701		1057640000		1157780000		0.000511623		0.000560065		3.61621e-05
	157		21.4171		6904260		6229350		3.3234e-06		2.99853e-06		2.34322e-07
	159		21.4062		16395500000		17225000000		0.00788405		0.00828293		0.000555596
	161		21.4025		1256580000		1339670000		0.000604038		0.000643979		4.25598e-05
	168		11.2325		8913190000		10755700000		1.87026e-05		2.25688e-05		0.000610325
	179		10.9071		182399000000		172230000000		0.0227714		0.0215019		0.000817654
21	27		584.609		785000000		625000000		0.121		0.0961		0.232
	65		32.711		277000000000		291000000000		0.133		0.14		0.0144
	76		32.409		528000000000		541000000000		0.25		0.255		0.0266
	79		31.303		2960000000		2400000000		0.00131		0.00106		0.000135
	93		31.186		296000000		213000000		0.00013		9.3e-05		1.33e-05
	97		30.515		12000000000		11900000000		0.00501		0.00499		0.000503
	118		22.69		152000000000		182000000000		0.0352		0.0422		0.00263
	121		22.618		295000000000		348000000000		0.0679		0.0801		0.00506
	138		21.998		90100000		68500000		1.96e-05		1.49e-05		1.42e-06
	154		21.832		4770000000		4850000000		0.00102		0.00104		7.35e-05
	172		11.152		11900000000000		11900000000000		0.663		0.663		0.0243
22	30		392.125		587000000		730000000		0.0505		0.0628024		0.0652
	48		38.176		23200000000		22500000000		0.00508		0.00492		0.000638
	56		36.6158		54514000000		47487100000		0.00660392		0.00575268		0.0477233
	63		32.806		511000000000		523000000000		0.253		0.258941		0.0273
	65		32.502		226000000000		223000000000		0.107		0.106		0.0115
	72		31.9392		3119070000		3038660000		0.000250777		0.000244311		0.00232353
	76		31.39		54300000000		52900000000		0.0235		0.0228941		0.00242
	79		31.272		9700000000		10000000000		0.00441		0.00454639		0.000454
	80		31.089		11640800000		11898300000		0.000863163		0.000882253		0.00862017
	82		30.844		56400000000		44200000000		0.00804		0.0063		0.000817
	89		30.6945		4843290000		4808690000		0.00034563		0.00034316		0.00339599
	93		30.597		8290000000		8280000000		0.00349		0.00348579		0.000351
	94		30.5891		8229350000		8266390000		0.000581241		0.000583857		0.00579787
	105		24.7511		29721300000		28895100000		0.00111209		0.00108118		0.0132688
	118		22.735		277000000000		314000000000		0.073		0.0827509		0.00547
	120		22.6731		428969000000		473393000000		0.0123381		0.0136158		0.182416
	121		22.663		134000000000		150000000000		0.0348		0.0389552		0.00259
	127		22.5318		869204000		702955000		2.45355e-05		1.98427e-05		0.000267507
	136		22.0723		1108130000		1430020000		2.94052e-05		3.79469e-05		0.000522225
	137		22.071		24100000000		20700000000		0.00454		0.0038995		0.00033
	138		22.041		5880000000		5120000000		0.00112		0.000975238		8.12e-05
	140		22.0097		10606200000		11206400000		0.000279055		0.000294846		0.00406922
	147		21.9052		2217290000		2086340000		5.75112e-05		5.41147e-05		0.000750408
	151		21.8792		2649510000		3056180000		6.84773e-05		7.8988e-05		0.00109663
	154		21.874		3390000000		3380000000		0.000726		0.000723858		5.23e-05
	171		11.1953		2296320000000		1869710000000		0.00795106		0.0064739		0.175655
	172		11.163		7380000000000		7360000000000		0.412		0.410883		0.0151
	176		11.119		24900000000		24000000000		0.00133		0.00128193		4.88e-05
23	38		373.023		3045970		2691610		0.000317699		0.000280738		0.000390142
	57		37.8501		36866500000		37645200000		0.0395898		0.040426		0.00493311
	61		34.366		129000000000		132000000000		0.0702		0.0718326		0.00794
	62		34.35		212000000000		213000000000		0.0376		0.0377		0.00425
	66		33.2791		1716850000000		1809610000000		1.42526		1.50227		0.156148
	67		33.097		70863200		79754200		5.81858e-05		6.54862e-05		6.33982e-06
	69		32.995		608000000000		571000000000		0.28		0.262961		0.0304
	71		32.9282		2879670000		3147520000		0.00234043		0.00255813		0.000253709
	75		32.866		10600000000		10100000000		0.0049		0.00466887		0.00053
	84		31.73		41900000		381000000		0.000173		0.0015731		1.8e-05
	95		31.471		22900000000		19400000000		0.00864		0.00731948		0.000895
	110		25.3145		11623500000		12689500000		0.00558333		0.00609536		0.0004653
	116		23.363		64900000000		77000000000		0.0189		0.0224237		0.00145
	117		23.332		111000000000		124000000000		0.00903		0.0101		0.000694
	122		23.0973		875641000000		905400000000		0.350159		0.36206		0.0266255
	124		23.0483		476008000		484086000		0.000189544		0.000192761		1.43821e-05
	125		23.035		333000000000		319000000000		0.0761		0.0729006		0.00577
	134		22.675		1700000000		1540000000		0.000356		0.000322494		2.66e-05
	141		22.4262		3687950000		3865100000		0.00139032		0.00145711		0.000102646
	152		22.337		8510000000		7800000000		0.00175		0.001604		0.000129
	180		11.1714		17895600000000		14647000000000		1.67411		1.3702		0.0615693
24	63		34.0177		443728000		454821000		0.000230939		0.000236711		2.58626e-05
	64		33.7063		3471230000		2986980000		0.00295613		0.00254373		0.000328024
	72		33.0869		3922630000		3992960000		0.0032189		0.00327661		0.000350617
	73		33.086		1513720000		1522230000		0.00173893		0.0017487		0.000189408
	74		33.0382		43301200000		43470500000		0.0495995		0.0497934		0.00539465
	76		32.4978		191408000000		189739000000		0.0909157		0.0901226		0.00972667
	77		32.4512		646191000000		641785000000		0.510083		0.506606		0.0544933
	78		32.3727		835222000000		834771000000		0.918554		0.918057		0.0978934
	79		32.3718		618330000000		605501000000		0.291422		0.285376		0.031057
	80		32.1753		185376000000		185871000000		0.143852		0.144237		0.0152374
	89		31.753		3398510000		3418860000		0.00256847		0.00258385		0.000268491
	91		31.7394		141946000		140989000		0.000150061		0.000149049		1.56797e-05
	93		31.6489		1076990000		1083370000		0.000485174		0.00048805		5.05508e-05
	94		31.6402		4413010000		4453580000		0.00331155		0.003342		0.000344938
	105		25.4348		68798.3		946352		3.3362e-08		4.5891e-07		2.79352e-09
	118		23.3107		135928000		103074000		3.3219e-05		2.51901e-05		2.54925e-06
	120		23.245		109000000		61200000		8.78e-06		4.96e-06		3.37e-06
	121		23.235		380869000		324143000		9.24759e-05		7.87026e-05		7.07361e-06
	127		23.097		1920000000		1920000000		0.000154		0.000154		5.83e-05
	136		22.614		124184000000		111891000000		0.0473285		0.0426436		0.00351329
	137		22.548		124000000000		112000000000		0.00946		0.00852		0.00351
	138		22.438		1410000000		1390000000		0.0106		0.0105		3.93e-05
	154		22.4062		478393000		476095000		0.000108016		0.000107497		7.96759e-06
	172		11.2997		566651000000		562003000000		0.03254		0.0322731		0.00121047
25	48		40.587		21500000000		16800000000		0.0053		0.00414		0.000708
	63		34.57		29900000000		31600000000		0.017		0.0179666		0.00193
	64		34.2488		5607630000		4931010000		0.000555906		0.000488831		0.00433554
	65		34.234		29700000000		32200000000		0.0169		0.0183226		0.00191
	76		33.002		576000000000		594000000000		0.291		0.300094		0.0316
	77		32.9537		205395000000		206522000000		0.0181381		0.0182377		0.16811
	79		32.872		154000000000		162000000000		0.0786		0.0826831		0.0085
	80		32.6692		621822000000		616460000000		0.0535022		0.0530409		0.493175
	82		32.399		664000000000		756000000000		0.104		0.119		0.0111
	89		32.2339		6406570000		6437860000		0.000529484		0.00053207		0.00501401
	93		32.127		3600000000		3600000000		0.00167		0.00167		0.000177
	105		25.7425		61923000000		55750600000		0.0026067		0.00234687		0.0276929
	120		23.5022		10892000000		11980900000		0.000348916		0.000383798		0.00496048
	136		22.8573		117342000000		127628000000		0.00345793		0.00376105		0.0499821
	137		22.856		300000000000		364000000000		0.0856		0.103861		0.00644
	138		22.823		97500000000		120000000000		0.0281		0.0345846		0.00211
	140		22.7901		336261000000		367547000000		0.00982208		0.0107359		0.143095
	147		22.6781		3393190000		3979180000		9.766e-05		0.000114526		0.001534
	154		22.645		1580000000		1650000000		0.00038		0.000396835		2.83e-05
	172		11.36		1390000000000		1400000000000		0.081		0.0815827		0.00303
26	46		312.483		24890900		23636100		0.00112451		0.00106782		0.00103801
	52		39.7186		53162600		670909000		4.93205e-06		6.22422e-05		0.000476015
	57		38.7785		5203090000		5311730000		0.00586493		0.00598738		0.000748729
	61		35.1296		346933000000		367134000000		0.0222691		0.0235658		0.20377
	66		33.9948		270437000000		272886000000		0.234265		0.236387		0.0262175
	67		33.8048		96101900000		83850300000		0.0823203		0.0718256		0.00916127
	69		33.6987		40045400000		43912200000		0.00226899		0.00248808		0.0224275
	71		33.6287		95579500000		93360900000		0.0810219		0.0791412		0.00896981
	75		33.5642		30278500000		28327800000		0.00169513		0.00158592		0.0143527
	94		32.1177		215076000		195681000		1.75839e-05		1.59982e-05		0.000151306
	110		25.7264		1573210000		1732970000		0.000780483		0.000859739		6.61018e-05
	116		23.7137		163190000000		201143000000		0.00322202		0.00397138		0.0508712
	122		23.4398		130753000000		130499000000		0.0538486		0.0537442		0.00415526
	124		23.3894		86057300000		86380600000		0.0352892		0.0354218		0.00271726
	125		23.3754		20603000000		22532200000		0.000389626		0.000426111		0.00553723
	134		23.0216		9200530000		10198300000		0.00365512		0.0040515		0.000277018
	135		23.0054		16672500000		15577200000		0.000300558		0.000280813		0.00370781
	141		22.749		50734600000		59062600000		0.0196809		0.0229115		0.00147393
27	36		779.462		26100000		31100000		0.00849		0.0101164		0.0218
	43		390.85		298000000		213000000		0.00682		0.00487		0.00877
	49		40.079		1430000000		1660000000		0.0012		0.00139301		0.000158
	61		35.191		50100000000		53500000000		0.0298		0.0318224		0.00345
	62		35.174		448000000000		474000000000		0.083		0.0879		0.00962
	69		33.755		193000000000		184000000000		0.0944		0.0899979		0.0105
	75		33.62		30600000000		28500000000		0.0145		0.0135049		0.0016
	84		32.432		67200000000		56100000000		0.0265		0.0221228		0.00283
	95		32.162		95200000000		83900000000		0.039		0.0343708		0.00413
	116		23.742		26800000000		33900000000		0.00858		0.0108531		0.000671
	117		23.71		232000000000		276000000000		0.0195		0.0233		0.00152
	125		23.403		114000000000		115000000000		0.0283		0.0285482		0.00218
	134		23.032		11300000000		10200000000		0.00243		0.00219345		0.000184
	143		22.743		34700000000		29900000000		0.00697		0.00600585		0.000522
	152		22.682		47200000000		41600000000		0.00962		0.00847864		0.000718
28	75		34.102		19300000000		19000000000		0.0101		0.00991		0.00113
	84		32.879		224000000		193000000		0.000109		9.38e-05		1.18e-05
	95		32.602		58700000000		45000000000		0.0281		0.0215		0.00301
	125		23.635		791000000000		546000000000		0.199		0.137		0.0155
	134		23.257		6160000000		4500000000		0.0015		0.00109		0.000115
	143		22.962		259000000		277000000		6.14e-05		6.56e-05		4.64e-06
	152		22.9		32600000000		30300000000		0.00769		0.00715		0.00058
	170		11.464		66500000000		69600000000		0.00393		0.00411		0.000148
29	64		34.9842		8927300000		8987630000		0.00818998		0.00824532		0.000943247
	65		34.9684		2128480000		2348230000		0.00117055		0.0012914		0.000134752
	67		34.9603		123247000000		102810000000		0.112913		0.0941902		0.0129954
	71		34.772		1557730000		1649640000		0.00141179		0.00149509		0.000161611
	72		34.3174		386784000000		389104000000		0.341441		0.343489		0.0385745
	73		34.3165		3724000000000		3757180000000		4.60216		4.64317		0.519919
	74		34.265		124401000		130139000		0.000153275		0.000160345		1.72899e-05
	77		33.6341		14554300		15891300		1.23415e-05		1.34753e-05		1.36653e-06
	78		33.5497		195622000		156509000		0.000231069		0.000184869		2.55212e-05
	80		33.3378		1617880000		1472480000		0.00134784		0.00122671		0.000147926
	89		32.8846		1879040000		1914390000		0.00152314		0.00155179		0.000164893
	91		32.8701		12699500000		13400600000		0.014399		0.015194		0.00155813
	93		32.773		1524980000		1314710000		0.000736659		0.000635086		7.94792e-05
	94		32.7637		4801130000		4925560000		0.00386319		0.00396331		0.000416687
	110		26.3902		520595000		609875000		0.000271772		0.00031838		2.36112e-05
	120		23.6899		139803000000		136781000000		0.0588111		0.05754		0.00458663
	136		23.1134		540867000		514122000		0.00021659		0.000205879		1.64806e-05
	172		11.4398		855620000000		769407000000		0.0503599		0.0452856		0.00189659
30	43		613.306		401000000		41500000		0.0226		0.00234		0.0457
	61		36.379		17300000000		20800000000		0.0124		0.0149087		0.00148
	62		36.361		39700000000		51500000000		0.00786		0.0102		0.000941
	63		35.3198		107600000000		110783000000		0.0603693		0.0621552		0.00701949
	69		34.847		107000000000		114000000000		0.0622		0.0662692		0.00714
	75		34.703		155000000000		161000000000		0.0872		0.0905755		0.00996
	84		33.438		104000000000		121000000000		0.0606		0.0705058		0.00667
	88		33.355		82400000000		95400000000		0.0137		0.0159		0.00151
	95		33.152		675000000000		627000000000		0.31		0.287956		0.0338
	102		26.595		89100000		73700000		2.35e-05		1.94383e-05		2.05e-06
	125		23.922		28800000000		33600000000		0.00865		0.0100917		0.000681
	134		23.535		85100000000		101000000000		0.0252		0.0299083		0.00195
	143		23.233		55400000000		68800000000		0.0167		0.0207394		0.00128
	149		23.184		45000000000		51700000000		0.00362		0.00416		0.000277
	152		23.17		366000000000		354000000000		0.0855		0.0826967		0.00652
31	64		35.5845		106414000000		87520500000		0.101005		0.0830719		0.0118324
	72		34.8949		15333000000		15568800000		0.0139949		0.0142101		0.00160769
	73		34.8939		196805000000		198975000000		0.251468		0.254241		0.028887
	74		34.8407		183624000000		183060000000		0.23391		0.233192		0.0268291
	77		34.1886		4182600000		4112150000		0.0036646		0.00360287		0.000412457
	80		33.8825		1958710000		2192090000		0.00168554		0.00188637		0.000188011
	89		33.4144		7817710000		7647490000		0.00654284		0.00640038		0.000719732
	91		33.3995		106967000000		108015000000		0.125221		0.126448		0.0137685
	92		33.3179		721346000		788477000		0.000840318		0.000918521		9.21704e-05
	128		23.9544		69903600000		68934200000		0.0420935		0.0415097		0.00331948
	130		23.9413		64948700000		62770300000		0.0390671		0.0377567		0.00307913
	150		23.2291		37345900000		38131000000		0.0211473		0.0215919		0.00161719
	174		11.482		391476000000		338391000000		0.0541608		0.0468165		0.00204726
32	42		716.687		62997800		58977800		0.0242551		0.0227073		0.0572272
	57		40.507		95297100		97574700		0.000117208		0.000120009		1.56299e-05
	58		40.4129		2243740000		2351310000		0.00384554		0.0040299		0.000511619
	59		40.3116		84320100		82038700		0.000143793		0.000139902		1.90826e-05
	68		34.9981		2621680000		2499870000		0.00336988		0.00321331		0.000388266
	71		34.9209		236760000000		214597000000		0.216419		0.196161		0.0248801
	83		33.5914		646190000000		646512000000		0.765178		0.765559		0.0846177
	85		33.5606		118991000000		134832000000		0.100459		0.113834		0.0110992
	95		33.2743		28280900000		28312700000		0.0328592		0.0328961		0.00359945
	110		26.4759		25687600		28841900		1.34972e-05		1.51546e-05		1.17642e-06
	111		26.4351		624884000		736004000		0.000458256		0.000539745		3.98805e-05
	112		26.4081		10850500		10984800		7.9409e-06		8.03914e-06		6.90362e-07
	131		23.9277		1647280		1994890		9.89729e-07		1.19858e-06		7.7963e-08
	140		23.333		8367210000		6939840000		0.0034146		0.0028321		0.00026229
	144		23.2916		67210100000		70152400000		0.0273308		0.0285273		0.00209567
	146		23.2817		356581000000		331644000000		0.202831		0.188646		0.0155461
	153		23.2342		9257690		8018410		3.74607e-06		3.2446e-06		2.86533e-07
	157		23.2194		183251000		162291000		0.00010368		9.1821e-05		7.92531e-06
	159		23.2066		19295500000		17438100000		0.010905		0.00985527		0.00083312
	161		23.2023		616316000		570075000		0.000348186		0.000322062		2.65958e-05
	169		11.672		1381180000000		1330450000000		0.141047		0.135866		0.00541976
	174		11.392		26827100000		27517800000		0.0026097		0.00267689		9.78724e-05
	179		11.356		1092360000000		1101750000000		0.147831		0.149102		0.00552665
33	64		35.6767		5711300000		6141330000		0.00544907		0.00585936		0.000639997
	65		35.6602		124483000000		102699000000		0.0711947		0.0587361		0.008358
	72		34.9835		218698000000		222744000000		0.200627		0.204338		0.0231059
	73		34.9826		11161300000		11516700000		0.0143339		0.0147903		0.00165077
	74		34.929		3532120000000		3532480000000		4.52225		4.52271		0.52001
	77		34.2737		2885190000		2449220000		0.00254047		0.00215658		0.000286645
	79		34.1851		2527190000		2750400000		0.00132825		0.00144556		0.000149481
	80		33.966		4304880000		5224110000		0.00372279		0.00451772		0.000416279
	89		33.4957		16203800000		16921100000		0.0136274		0.0142307		0.0015027
	91		33.4806		160599000000		161011000000		0.188919		0.189404		0.0208229
	93		33.38		51666300		63027500		2.5891e-05		3.15842e-05		2.84515e-06
	94		33.3703		48474900000		47965200000		0.0404626		0.0400371		0.00444513
	103		26.6197		533676000		465192000		0.000283467		0.000247091		2.48414e-05
	106		26.6027		64452400		65242700		2.05145e-05		2.0766e-05		1.79662e-06
	118		24.237		5258490000		5513510000		0.00130419		0.00136744		0.000100825
	120		24.155		78076500000		77668900000		0.0337254		0.0335493		0.00266524
	121		24.155		2080000		25400000		1.69e-07		2.06e-06		3.87e-08
	136		23.485		2932110000		2405640000		0.00120486		0.000988527		9.28705e-05
34	51		41.7882		2436530000		2775250000		0.00318931		0.00363267		0.000438754
	52		41.737		276000000		239000000		0.000188		0.000162797		2.58e-05
	57		40.7007		2485090		2309060		3.08577e-06		2.86719e-06		4.13463e-07
	62		36.681		11300000000		16800000000		0.00228		0.00338		0.000275
	66		35.463		425527000		389880000		0.000401139		0.000367535		4.68317e-05
	71		35.0648		54215000000		56254000000		0.0499665		0.0518458		0.00576794
	75		34.995		6660000000		5520000000		0.00304		0.00251964		0.00035
	84		33.709		1340000000000		1310000000000		0.671		0.655978		0.0744
	85		33.6935		775006000000		812621000000		0.6595		0.69151		0.0731529
	95		33.418		150000000000		134000000000		0.0672		0.060032		0.00739
	100		26.798		3480000000		3660000000		0.000375		0.000394		3.31e-05
	101		26.78		4242360000		3238850000		0.00228059		0.00174113		0.000201062
	110		26.5585		383287		399984		2.02651e-07		2.11479e-07		1.77184e-08
	122		24.1285		1273180000		1105840000		0.00055561		0.000482584		4.41339e-05
	143		23.364		671000000000		691000000000		0.17		0.175067		0.013
	144		23.3556		413306000000		414098000000		0.168994		0.169318		0.0129937
	149		23.314		1030000000000		1030000000000		0.0841		0.0838		0.00645
	152		23.3		80300000000		74100000000		0.0181		0.0167025		0.00139
	153		23.2978		12496600		10585700		5.08442e-06		4.30694e-06		3.89966e-07
	167		11.728		739000000000		723000000000		0.0152		0.0149		0.000589
	168		11.725		419000000000		534000000000		0.033		0.0420573		0.00127
	178		11.4073		156382000000		143734000000		0.0152534		0.0140197		0.000572822
35	38		1222.23		11439900		14025600		0.0128099		0.0157053		0.051543
	45		515.564		127235000		125701000		0.0354909		0.035063		0.060238
	57		40.7209		395812000		408737000		0.000491973		0.000508039		6.59523e-05
	58		40.6258		4641500000		4698870000		0.00803912		0.00813849		0.00107518
	59		40.5235		10998300000		10916800000		0.0189533		0.0188129		0.00252849
	61		36.7161		43682100000		57678500000		0.0032012		0.00422691		0.03497
	66		35.4783		32067300000		28230100000		0.0302555		0.0266352		0.00353377
	67		35.2714		135408000000		109450000000		0.126272		0.102066		0.0146623
	68		35.1577		104207000000		85947600000		0.135172		0.111487		0.015645
	71		35.0798		118710000000		108833000000		0.109501		0.10039		0.0126457
	75		35.0096		33259700000		39188400000		0.00211309		0.00248977		0.0216023
	81		33.8926		303963000000		300310000000		0.261727		0.258582		0.0292028
	84		33.7226		380585000000		382741000000		0.0216099		0.0217324		0.195756
	85		33.7073		615300000000		612601000000		0.524027		0.521728		0.0581499
	83		33.7384		1260030000000		1224200000000		1.50514		1.46234		0.167175
	96		33.4185		97393400000		100834000000		0.114143		0.118175		0.0125576
	110		26.5671		96117000		114105000		5.08519e-05		6.03685e-05		4.44756e-06
	111		26.5261		900908000		1030510000		0.000665231		0.000760929		5.80919e-05
	112		26.4988		2104520000		2164170000		0.00155079		0.00159475		0.000135285
	129		24.0403		87035100000		69691000000		0.0527863		0.0422672		0.00417765
	131		24.0022		307727000		253611000		0.000186043		0.000153326		1.47006e-05
	141		23.4038		164319000000		148524000000		0.067465		0.0609801		0.00519801
	143		23.3703		191831000000		199273000000		0.00362539		0.00376602		0.0489494
	146		23.3522		654085000000		612122000000		0.374315		0.350301		0.0287764
	152		23.3062		108608000		26737800		2.0357e-06		5.01163e-07		6.53187e-06
	157		23.2896		35442100		33697800		2.01738e-05		1.91809e-05		1.54675e-06
	159		23.2767		38882500000		38328000000		0.0221076		0.0217923		0.00169408
	161		23.2723		5760880000		5542490000		0.00327427		0.00315015		0.000250857
	168		11.727		501117000000		439110000000		0.00119657		0.00104851		0.0271591
	179		11.3728		5095080000000		4651870000000		0.691561		0.631404		0.0258921
36	54		41.358		1290000000		1090000000		0.00084		0.000709767		0.000114
	63		36.262		31700000000		38100000000		0.0225		0.0270426		0.00269
	64		35.9081		232779000		196276000		2.65955e-05		2.24249e-05		0.0001897
	65		35.891		11800000000		15300000000		0.00888		0.0115139		0.00105
	72		35.2059		3174270000000		3160500000000		0.341805		0.340323		2.93633
	76		34.54		3900000000		4390000000		0.00235		0.00264526		0.000268
	77		34.4871		3516610000		2859990000		0.000355946		0.000289484		0.00254975
	80		34.1757		3234120000		2691400000		0.000318563		0.000265105		0.0023563
	82		33.88		5180000000		3940000000		0.000891		0.000678		9.94e-05
	89		33.6995		26400100000		25947300000		0.00249326		0.00245049		0.0220881
	93		33.582		8910000000		9520000000		0.00483		0.00516067		0.000534
	94		33.5726		87747900000		88151300000		0.00819369		0.00823136		0.0744759
	127		24.1099		1028900000000		1053690000000		0.0355837		0.0364409		0.459116
	136		23.5846		367802000		388342000		1.19067e-05		1.25716e-05		0.000161916
	147		23.3939		12904900000		13423900000		0.000407711		0.000424108		0.00550684
	151		23.3643		34557000000		35108100000		0.00108763		0.00110497		0.0143658
	154		23.358		3120000000		3350000000		0.000823		0.00088367		6.33e-05
	171		11.5716		27780200000		33944800000		0.00010622		0.000129791		0.00340706
	172		11.537		326000000000		349000000000		0.0209		0.0223745		0.000794
37	58		41.7		1580510000		1585180000		0.00288414		0.00289266		0.000395934
	59		41.5922		25873400000		25788500000		0.0469703		0.0468162		0.0064314
	66		36.2948		12150800000		11042900000		0.0119981		0.0109041		0.0014336
	68		35.9593		8631390000		7739430000		0.0117125		0.0105021		0.00138654
	71		35.8778		97159700000		80223900000		0.0937466		0.0774058		0.0110727
	75		35.8044		306462000000		363861000000		0.0208269		0.0247278		0.209787
	81		34.637		196468000000		170717000000		0.176681		0.153523		0.0201465
	83		34.4759		43593100000		38996100000		0.0543746		0.0486407		0.00617138
	84		34.4594		62324700000		68490000000		0.00377593		0.00414945		0.0365773
	85		34.4435		415842000000		359586000000		0.369795		0.319768		0.0419314
	95		34.1552		44202000000		39562200000		0.00260767		0.00233395		0.020757
	96		34.142		1748820000000		1681170000000		2.13929		2.05654		0.240452
	111		26.9799		157024000		178997000		0.000119948		0.000136733		1.06538e-05
	112		26.9517		3940750000		4210460000		0.00300398		0.00320958		0.000266534
	129		24.4125		17185500000		14802900000		0.0107481		0.00925798		0.000863798
	131		24.3731		117971000		98832100		7.35437e-05		6.16124e-05		5.90103e-06
	141		23.7564		99246800000		82584400000		0.0419851		0.0349363		0.00328357
	143		23.7219		29903700000		34762700000		0.000591034		0.000687069		0.00879794
	146		23.7032		17739700000		15374500000		0.0104594		0.00906487		0.000816177
	157		23.6386		905650000		810663000		0.00053107		0.00047537		4.1328e-05
	159		23.6254		883856000000		811569000000		0.517708		0.475367		0.0402656
	161		23.6209		68842500000		62952500000		0.0403084		0.0368597		0.00313446
38	72		36.1157		28160000000		27685900000		0.0275324		0.0270688		0.00327348
	73		36.1147		14733500000		14435800000		0.0201661		0.0197585		0.00239759
	74		36.0577		187374000000		185099000000		0.255653		0.252549		0.0303472
	76		35.415		80081300000		70907600000		0.0451726		0.0399979		0.00526664
	77		35.3597		17497400000		14934700000		0.0163986		0.0139968		0.00190892
	79		35.2654		9265020000		9931710000		0.00518218		0.00555508		0.000601633
	80		35.0323		8730190		10555700		8.03119e-06		9.71054e-06		9.26232e-07
	89		34.5322		528779000000		533092000000		0.472652		0.476507		0.0537325
	91		34.5162		2870640000000		2877930000000		3.58898		3.59809		0.407817
	93		34.4092		32989600000		32486000000		0.0175669		0.0172988		0.00198995
	94		34.3989		187362000000		188196000000		0.166184		0.166923		0.0188194
	120		24.5332		5098220000		4826020000		0.00230008		0.00217728		0.000185767
	138		23.9522		6323910000		4764270000		0.00163172		0.0012293		0.000128666
	154		23.7553		12887000000		10822400000		0.00327071		0.00274671		0.000255784
	172		11.6329		492609000000		454334000000		0.0299809		0.0276514		0.00114816
39	91		34.6274		22370500000		22611500000		0.028149		0.0284522		0.00320889
	92		34.5397		35231100000		34609600000		0.0441072		0.0433291		0.00501533
	150		23.8166		7699200000		7560110000		0.004583		0.0045002		0.000359335
	156		23.797		14031600000		12024800000		0.0083387		0.00714611		0.000653268
	174		11.6237		1354750000000		1036580000000		0.192084		0.146973		0.00735033
40	73		36.5228		17944700000		17839700000		0.0251194		0.0249724		0.00302026
	74		36.4645		3406080000		3384960000		0.00475269		0.00472322		0.000570532
	77		35.7508		70667500000		58859200000		0.0677032		0.0563902		0.00796829
	80		35.4162		8139650000		7447460000		0.00765293		0.00700213		0.000892278
	89		34.9051		121311000000		120724000000		0.110789		0.110253		0.0127309
	91		34.8888		486371000000		487999000000		0.621277		0.623357		0.0713579
	92		34.7998		656149000000		656441000000		0.833875		0.834246		0.0955318
	94		34.769		29708200000		29778700000		0.0269201		0.026984		0.00308134
	128		24.7109		5276350000		5038880000		0.00338109		0.00322892		0.000275053
	130		24.697		2874320000		2765840000		0.00183979		0.00177036		0.000149583
	150		23.9399		161424000000		158684000000		0.0970866		0.0954385		0.0076516
	156		23.9201		234664000000		228624000000		0.140903		0.137276		0.0110957
	174		11.653		436776000000		381444000000		0.0622414		0.0543565		0.00238775
41	64		37.4705		4001710000		5213900000		0.00051952		0.000676891		0.0054873
	65		37.452		1500000000		1380000000		0.000869		0.00079948		0.000107
	72		36.7066		4499790000		4568030000		0.000549177		0.000557505		0.00461354
	76		35.983		5150000000		6520000000		0.00379		0.00479821		0.000449
	77		35.9259		18037900000		22427500000		0.00206394		0.0025662		0.0216977
	79		35.829		51100000000		61000000000		0.0352		0.0420196		0.00416
	82		35.267		4000000000		3390000000		0.000746		0.000633		8.66e-05
	89		35.072		1857840000000		1846030000000		0.197779		0.196521		1.70207
	93		34.945		1830000000000		1840000000000		1.01		1.01552		0.116
	94		34.9345		343987000000		342047000000		0.0361906		0.0359864		0.312905
	127		24.8044		4620110000		4579710000		0.000173991		0.000172469		0.00211209
	147		24.0472		628219000000		639287000000		0.0215572		0.021937		0.277104
	151		24.0158		100734000000		101181000000		0.00344317		0.00345845		0.0437435
	154		24.009		622000000000		634000000000		0.164		0.167164		0.013
	172		11.693		324000000000		402000000000		0.0247		0.0306463		0.000951
42	65		37.4547		1343450000		1367540000		0.000847623		0.000862822		0.000104515
	72		36.7089		2042860000		1912650000		0.00206348		0.00193195		0.000249368
	73		36.7079		13117700000		12970700000		0.018549		0.0183412		0.00224156
	74		36.6489		7081470000		6846920000		0.00998142		0.00965081		0.00120427
	78		35.8318		30296800000		24729600000		0.0408207		0.0333196		0.00481527
	79		35.8308		91461200000		78197400000		0.0528102		0.0451516		0.00622937
	80		35.5902		9783600000		8198170000		0.00928918		0.00778387		0.00108838
	89		35.0742		843665000000		846105000000		0.777969		0.780219		0.0898298
	91		35.0577		207660000000		208191000000		0.267833		0.268518		0.0309113
	93		34.9473		232148000000		232742000000		0.127515		0.127841		0.0146705
	94		34.9366		617838000000		619921000000		0.565269		0.567174		0.065014
	106		27.5888		63423700		63653300		2.17113e-05		2.17899e-05		1.97192e-06
	118		24.9647		535201000		437432000		0.000150017		0.000122612		1.23293e-05
	120		24.8055		2007130000		1758760000		0.000925736		0.000811183		7.55971e-05
	154		24.0105		81971300000		78607100000		0.0212536		0.0203814		0.00167998
	172		11.6937		172455000000		150946000000		0.010606		0.00928314		0.000408295
43	63		38.0203		545000000		592000000		0.0164		0.0178		0.0139
	65		37.6132		31700000		19900000		0.000827		0.000518		0.000655
	76		36.1323		1580000000		1910000000		0.0259		0.0312		0.0162
	79		35.976		1010000000		1370000000		0.0158		0.0214		0.00971
	93		35.0852		45600000		37400000		0.000557		0.000457		0.000302
	97		28.129		24800000000		28700000000		0.0649		0.075		0.0163
	104		27.6751		230000000000		232000000000		0.552		0.555		0.132
	138		24.2783		337000000		402000000		0.000415		0.000495		7.16e-05
	154		24.0755		438000000		307000000		4.97e-05		3.48e-05		2.6e-06
	172		11.7092		3030000000		2530000000		0.00034		0.000284		1.77e-05
44	73		37.0522		25152900000		25091400000		0.0373949		0.0373034		0.00463364
	74		36.9925		23412500000		23575500000		0.0346929		0.0349345		0.00429176
	84		35.5429		13900000000		13300000000		0.00788		0.00758		0.000922
	95		35.219		970000000000		939000000000		0.541		0.524		0.0628
	128		25.2169		7112070000		6921350000		0.00474599		0.00461872		0.000393994
	130		25.2024		5508890000		5424240000		0.00367193		0.00361551		0.000304654
	143		24.23		8310000000		6800000000		0.00219		0.0018		0.000175
	152		24.161		536000000000		447000000000		0.141		0.117		0.0112
45	94		35.7792		14117300000		13263400000		0.0135466		0.0127272		0.00159563
46	72		37.6835		98820000000		98304200000		0.0130493		0.0129812		0.104639
	80		36.5055		12442500000		14735300000		0.00149373		0.00176899		0.0147196
	82		36.168		112000000000		79700000000		0.022		0.0156		0.00262
	89		35.9628		533687000000		529525000000		0.0612543		0.0607766		0.513348
	93		35.829		10600000000		10400000000		0.00598		0.00586717		0.000705
	94		35.8183		2566410000000		2553080000000		0.291023		0.289512		2.45522
	127		25.2467		40356000000		42441400000		0.00160254		0.00168535		0.0202776
	147		24.4626		142669000000		146576000000		0.0051538		0.00529493		0.0657486
	151		24.4302		860300000000		861732000000		0.0309542		0.0310058		0.385518
	154		24.424		3440000000		3350000000		0.000899		0.00087548		7.23e-05
	171		11.8272		48999100000		57959100000		0.000200043		0.000236623		0.00607721
	172		11.791		27500000000		27300000000		0.00171		0.00169756		6.63e-05
47	49		1504.95		136000000		149000000		0.152		0.166529		0.754
	51		1231.02		336777000		294062000		0.38255		0.33403		1.55033
	52		1188.48		66900000		69500000		0.0441		0.0458139		0.173
	57		688.833		279.342		216.28		9.93532e-08		7.69241e-08		2.25303e-07
	61		242.111		1110000000		1380000000		0.0364		0.0452541		0.029
	62		241.304		1240000000		1900000000		0.0108		0.0166		0.00857
	66		196.828		8763270		9123880		0.000254483		0.000264955		0.000164898
	67		190.626		892979000		836864000		0.0243233		0.0227949		0.0152643
	71		185.158		3317340000		2781020000		0.0852497		0.0714673		0.0519644
	75		183.22		1130000000		1220000000		0.0184		0.0198655		0.0111
	99		70.707		163000000000		168000000000		0.378		0.389595		0.088
	100		70.431		208000000000		207000000000		0.154		0.154		0.0358
	101		70.3068		191947000000		186447000000		0.711204		0.690825		0.164612
	102		70.211		27500000000		28400000000		0.0629		0.0649585		0.0145
	110		68.8003		88164.8		89448.6		3.12819e-07		3.17374e-07		7.08523e-08
	122		54.5648		12992300		12408600		2.89955e-05		2.76928e-05		5.20851e-06
	124		54.2924		292700000		273373000		0.000646725		0.000604022		0.000115592
	125		54.217		104000000		104000000		0.000137		0.000137		2.45e-05
	141		50.9623		11479100		11081300		2.23473e-05		2.15728e-05		3.74926e-06
	143		50.804		242000000		251000000		0.000291		0.000301822		4.87e-05
	144		50.7654		183831000		178536000		0.000355118		0.00034489		5.93486e-05
	149		50.568		366000000		378000000		0.00014		0.000145		2.33e-05
	152		50.501		41300000		41800000		4.8e-05		4.85811e-05		7.98e-06
	153		50.4933		4322.72		4537.43		8.26119e-09		8.67151e-09		1.37324e-09
48	52		1801.17		83800000		74300000		0.122		0.108		0.725
	75		193.36		4230000000		3510000000		0.0711		0.059		0.0453
	99		72.168		32100000000		30000000000		0.0751		0.0702		0.0178
	102		71.651		170000000000		161000000000		0.393		0.371		0.0926
	152		51.242		248000000		269000000		0.000293		0.000318		4.94e-05
49	64		239.155		213451000		235985000		0.00720485		0.00796547		0.0101172
	72		211.113		10547400		9294600		0.000244894		0.000215806		0.000310512
	77		187.659		3362160000		3885750000		0.0548295		0.0633682		0.102573
	82		170.982		101000000		70500000		0.000443		0.000309		0.000249
	89		166.487		66407800		61645200		0.00075622		0.000701987		0.00128079
	97		75.994		62400000000		70700000000		0.184		0.208474		0.046
	103		72.8966		275937000000		279368000000		0.263766		0.267046		1.11278
	105		72.3089		50318700000		50041600000		0.0469454		0.0466869		0.196125
	127		56.1509		447400000		479642000		0.000195458		0.000209544		0.00113357
	147		52.4147		244986000		292470000		8.70539e-05		0.000103927		0.000602288
	151		52.266		19377400		22079800		6.82717e-06		7.7793e-06		4.52117e-05
	154		52.236		204000000		245000000		0.0003		0.000360294		5.16e-05
51	56		1694.6		267161		241747		0.000575075		0.000520369		0.0032082
	80		183.648		1918750000		1540070000		0.0485074		0.038934		0.0293267
	89		170.689		13468900		14811000		0.000294144		0.000323455		0.000165286
	97		76.8577		151075000000		132440000000		0.401361		0.351853		0.101553
	103		73.6909		103976000000		102570000000		0.423233		0.417509		0.102675
	104		73.5609		11846600000		11737800000		0.0288308		0.028566		0.0069819
	105		73.0904		1000770000		970180000		0.0040075		0.003885		0.000964283
	120		57.5226		66483700		57640800		0.000159767		0.000138517		2.97808e-05
	138		53.6218		20569300		17165400		2.56367e-05		2.13942e-05		4.44293e-06
52	64		249.722		358905000		427529000		0.0137924		0.0164295		0.0199847
	72		219.305		12888100		16166100		0.000335447		0.000420764		0.000582801
	80		184.634		1488380000		1618950000		0.0231172		0.0251451		0.0413688
	82		176.316		6020000000		4010000000		0.0281		0.0187		0.0163
	89		171.54		23727500		28693300		0.000295555		0.00035741		0.000632893
	93		168.548		6960000		5870000		7.5e-05		6.32543e-05		4.16e-05
	94		168.3		173393000		180936000		0.00203974		0.00212848		0.00384162
	97		77.03		15200000000		17100000000		0.0455		0.0511875		0.0115
	103		73.8491		32753800000		33459200000		0.0325526		0.0332537		0.13678
	105		73.246		357743000000		357728000000		0.346906		0.346892		1.4386
	127		56.7144		187003000		181176000		8.41815e-05		8.15582e-05		0.000436822
	147		52.9053		8956710		10440000		3.27291e-06		3.81492e-06		2.19036e-05
	154		52.723		48200000		55600000		6.95e-05		8.01701e-05		1.21e-05
53	67		244.871		55850200		51361200		0.00251025		0.00230849		0.00202361
	68		239.492		360037000		295917000		0.0216708		0.0178114		0.0170859
	96		176.811		67551500		84803000		0.00221616		0.00278213		0.00128997
	99		77.0375		41096100000		54686300000		0.0278194		0.0370191		0.145966
	102		76.4491		3527840000		4368530000		0.00233381		0.00288996		0.0114828
	110		74.779		114846000000		114185000000		0.481384		0.478615		0.118507
	111		74.4547		675623000000		670574000000		3.93038		3.90101		0.963381
	112		74.2405		629515000		608194000		0.00364111		0.00351779		0.000889907
	125		57.8631		72973100		77275400		2.09319e-05		2.2166e-05		0.000116363
	131		57.4876		104907000		88295100		0.000363831		0.000306219		6.88564e-05
	146		53.8948		101103000		115654000		0.000308179		0.000352533		5.4679e-05
	157		53.5621		71649400		62310200		0.000215712		0.000187595		3.80366e-05
	179		15.7081		101482000		93121200		2.62773e-05		2.41124e-05		1.35886e-06
54	62		336.919		7470000		9720000		0.000127		0.000165		0.000141
	66		256.115		565003000		537515000		0.0277804		0.0264289		0.0234231
	81		191.453		1118850000		1013390000		0.0307408		0.0278434		0.0193753
	85		185.688		818577000		622771000		0.0211566		0.0160959		0.012933
	95		177.607		101000000		103000000		0.00146		0.00148891		0.000851
	99		77.121		12500000000		16500000000		0.044		0.05808		0.0112
	100		76.791		62600000000		80500000000		0.0554		0.0711		0.014
	101		76.6442		754710000		569247000		0.00332321		0.00250656		0.000838508
	110		74.8573		622488000000		620434000000		2.61467		2.60605		0.64435
	122		58.3065		276999000		498174000		0.000705877		0.0012695		0.000135493
	125		57.91		119000000		109000000		0.000165		0.000151134		3.14e-05
	169		16.3232		283841000		228243000		0.000613106		0.000493013		0.00010835
55	71		243.133		231190000		189759000		0.0102442		0.00840833		0.00819957
	110		75.4888		3233440000		3263160000		0.0138117		0.0139386		0.00343242
	111		75.1583		81447200000		81842900000		0.48281		0.485155		0.11946
	112		74.9399		1345430000		1324180000		0.00792927		0.00780404		0.00195622
	129		58.1285		4250510		2404200		1.50718e-05		8.525e-06		2.88419e-06
	131		57.9061		14385500		13264700		5.06197e-05		4.66759e-05		9.64972e-06
	153		54.005		1374680		1127870		3.00531e-06		2.46573e-06		5.34311e-07
	159		53.8562		5356010		5506420		1.63027e-05		1.67605e-05		2.89045e-06
	161		53.833		16191700		21163700		4.92418e-05		6.43628e-05		8.72676e-06
	179		15.7392		233303000		245297000		6.06499e-05		6.37678e-05		3.14255e-06
56	68		254.12		181846000		189718000		0.0123233		0.0128568		0.0103095
	96		184.659		1718750000		1848800000		0.0615031		0.0661568		0.0373885
	101		77.9975		103740000		83501000		0.000473072		0.000380777		0.000121473
	110		76.1477		954867000		977063000		0.00415025		0.00424672		0.0010404
	111		75.8114		1556480000		1571250000		0.00938768		0.00947676		0.00234295
	112		75.5893		762054000000		753929000000		4.56933		4.52061		1.13706
	131		58.293		1945320		1641590		6.93697e-06		5.85388e-06		1.33124e-06
	157		54.2606		595819		536169		1.8409e-06		1.6566e-06		3.28841e-07
57	77		220.189		6078130		7194530		0.000220891		0.000261463		0.000160119
	78		216.621		221230		271566		1.08941e-05		1.33728e-05		7.76897e-06
	80		208.081		7461330		6497090		0.000242159		0.000210864		0.000165884
	91		191.108		1525520000		1241560000		0.0584687		0.0475851		0.0367852
	120		59.7169		39946500		43717000		0.000103343		0.000113097		1.99868e-05
	150		54.5214		227502000		192507000		0.00110295		0.000600521		0.000246796
58	73		256.883		541220000		644136000		0.0374793		0.0446061		0.0316955
	74		254.025		126364000		153154000		0.00855697		0.0103711		0.00715594
	113		76.1789		93940100000		93460400000		0.572093		0.569171		0.143474
59	64		305.39		30146300		27917900		0.00210747		0.00195169		0.00211879
	73		261.05		188162000		184143000		0.0134563		0.0131689		0.0115643
	74		258.099		355634000		369962000		0.0248612		0.0258628		0.0211241
	78		222.384		1429850		1373390		7.42069e-05		7.12765e-05		5.43273e-05
	113		76.5412		3396030000		3384410000		0.0208789		0.0208075		0.00526107
61	63		2252.53		31800000		35200000		0.0804		0.0889962		0.596
	64		1397.56		192919000		242757000		1.29951		1.63522		0.355413
	65		1372.7		59800000		76100000		0.0645		0.0820811		0.291
	89		393.605		1440270		1678740		0.000216728		0.000252612		0.00019495
	93		378.197		4060000		5350000		0.000344		0.0004533		0.000429
	105		96.4907		1642670000		1747320000		0.00364161		0.00387362		0.0121944
	118		71.704		127000000000		135000000000		0.311		0.330591		0.0735
	120		71.0903		187878000000		195586000000		0.16657		0.173403		0.740929
	121		70.992		59800000000		62400000000		0.142		0.148174		0.0331
	127		69.719		631930000		593718000		0.000528458		0.000496502		0.00216321
	140		64.9515		22940300		19150700		1.55116e-05		1.29492e-05		6.05594e-05
	147		64.0501		274793000		251979000		0.000178178		0.000163385		0.000774858
	151		63.8282		148040000		164324000		9.49964e-05		0.000105446		0.000501817
	154		63.783		338000000		316000000		0.000578		0.000540379		0.000121
	171		16.8677		12879800000		15235700000		0.000152533		0.000180433		0.0032493
62	63		2324.9		20200000		17100000		0.0491		0.0416		0.376
	65		1399.24		146000000		160000000		0.129		0.141		0.594
	76		554.033		6910000		15500000		0.000954		0.00214		0.00174
	79		519.545		141000		1150000		1.72e-05		0.00014		2.93e-05
	93		380.184		7950000		9610000		0.000517		0.000624		0.000647
	106		97.443		56500000		47300000		0.000241		0.000202		7.75e-05
	118		71.775		66600000000		69500000000		0.154		0.161		0.0364
	121		71.062		124000000000		127000000000		0.281		0.289		0.0657
	154		63.84		599000000		558000000		0.0011		0.00102		0.000231
63	66		1975.13		70393700		52876600		0.205846		0.154622		1.33847
	67		1488.99		102919		99028.4		0.000171039		0.000164574		0.000838413
	71		1209.9		258642		267092		0.000283803		0.000293075		0.00113042
	110		100.396		648751000		749255000		0.0049015		0.00566084		0.00162001
	122		72.7137		344294000000		339492000000		1.36452		1.34549		0.326638
	124		72.2308		2621210		2634290		1.0251e-05		1.03021e-05		2.43757e-06
	141		66.4537		137496000		154533000		0.000455142		0.000511537		9.95719e-05
	153		65.6585		12686000		13895200		4.09945e-05		4.49017e-05		8.86108e-06
	169		17.2816		7265110		13725900		1.6264e-06		3.07274e-06		9.25295e-08
64	110		103.21		84053800		97750700		0.000671151		0.000780518		0.000228041
	111		102.593		352285000		417411000		0.00389116		0.00461051		0.00131422
	112		102.187		822342000		768883000		0.00901135		0.00842554		0.00303149
	116		76.993		129417000000		151157000000		0.0874549		0.102146		0.402995
	122		74.1786		63250200000		61432300000		0.260878		0.25338		0.0637069
	124		73.6761		39945500000		39313300000		0.162532		0.15996		0.0394218
	125		73.5381		8709050000		8856620000		0.005128		0.00521489		0.0215408
	129		73.2856		427442000000		423505000000		2.40914		2.38695		0.581234
	131		72.9325		1690920000		1676160000		0.00943867		0.00935628		0.00226623
	134		70.1465		532186000		699384000		0.00196288		0.00257956		0.000453283
	141		67.6751		2450280000		2760590000		0.00841186		0.00947716		0.0018741
	146		67.2454		570756000		559853000		0.00270845		0.00265671		0.00059959
	157		66.7283		15414600		15408300		7.20275e-05		7.19981e-05		1.58226e-05
	159		66.6226		682552000		584400000		0.00317925		0.00272207		0.000697297
	161		66.587		28661100		33480800		0.000133358		0.000155784		2.92334e-05
65	84		591.986		7980000		9230000		0.00146		0.0016887		0.00284
	99		107.719		37900000		34800000		0.000171		0.000157013		5.88e-05
	100		107.077		2690000		33600000		4.36e-06		5.44e-05		1.49e-06
	102		106.566		9300000		9950000		5.08e-05		5.43505e-05		1.78e-05
	110		103.348		82089500		96654700		0.000657224		0.000773836		0.000223608
	116		77.0711		43400000000		47100000000		0.121		0.131316		0.0299
	117		76.7372		78100000000		82500000000		0.0661		0.0698		0.0163
	122		74.25		7529010000		7354900000		0.0311135		0.030394		0.00760529
	124		73.7465		373608000000		369743000000		1.52306		1.5073		0.369768
	125		73.6117		115000000000		114000000000		0.268		0.26567		0.0635
	134		70.2103		953856000		1121060000		0.00352454		0.00414239		0.000814657
	141		67.7345		678556000		619004000		0.00233359		0.00212878		0.000520361
	143		67.455		519000000		541000000		0.00111		0.00115705		0.000246
	152		66.9244		863000000		711000000		0.00138		0.00113694		0.000298
	169		66.9085		2391320		2638500		8.0245e-06		8.85395e-06		1.76754e-06
	180		16.7541		405633000		343817000		8.53482e-05		7.23417e-05		4.70746e-06
66	118		76.9466		65093300000		51624300000		0.173334		0.137468		0.043908
	120		76.2417		899718000		715818000		0.00234509		0.00186576		0.000587722
	127		74.6655		71043300000		70407200000		0.29688		0.294222		0.0729747
	137		69.8477		447054000		367956000		0.00163487		0.00134561		0.000375928
	138		69.5328		278341000		335403000		0.000605237		0.000729315		0.000138543
67	76		1422.02		14585000		15894800		0.0132643		0.0144556		0.0620957
	80		988.463		24152300		19860200		0.0176888		0.0145453		0.057561
	118		77.9379		43377800		33755700		0.000118504		9.22176e-05		3.04056e-05
	120		77.213		2.42e-09		1230000000		0.00216		0.00155		0.00275
	127		75.599		32638000000		32315200000		0.140087		0.139198		0.0348331
	137		70.6498		10658500000		9889310000		0.0239269		0.0222002		0.00556504
	138		70.3413		29673200000		29902200000		0.0660319		0.0665416		0.015291
68	94		691.769		331665		287509		0.00011897		0.000103131		0.000270938
	113		107.543		18342900		19774400		0.000222626		0.000240001		7.88185e-05
	128		76.0327		43981100000		44073300000		0.266817		0.267376		0.0667858
	130		75.9009		36272900000		36138400000		0.219292		0.218479		0.054795
	150		69.1776		2757870000		2866470000		0.01385		0.0143954		0.00315419
69	76		1639.06		3110000		3880000		0.00468		0.00583871		0.0253
	79		696.64		555000		520000		0.000113		0.000105874		0.00026
	94		692.438		4571200		5290470		0.00374509		0.00433437		0.0019014
	120		77.7729		328799000		430731000		0.000381684		0.000500011		0.0019529
	127		76.1346		601803000000		610432000000		0.655373		0.66477		2.65228
	137		71.118		1400000000		1300000000		0.00295		0.00273929		0.000692
	138		70.805		376000000		321000000		0.000724		0.000618096		0.000169
	147		69.4246		552285000		619926000		0.000456029		0.000511881		0.00223967
	151		69.164		3202090000		3258760000		0.00261435		0.00266062		0.0116851
	154		69.111		202000000		219000000		0.000471		0.000510639		0.000107
	171		17.2187		2695130000		2994500000		3.39525e-05		3.77239e-05		0.000665495
71	80		1167.19		94838900		75940400		0.096848		0.0775491		0.372138
	103		111.337		55861900		49712800		0.000519054		0.000461918		0.000190249
	118		78.8904		23774000		17888700		6.65458e-05		5.00723e-05		1.72828e-05
	120		78.1495		11565400000		11392700000		0.0507267		0.0499694		0.0127743
	136		71.4457		119256000000		112429000000		0.4563		0.430179		0.107324
	137		71.4316		43699500000		42855900000		0.100283		0.0983468		0.0235823
	138		71.1162		109627000000		103997000000		0.249357		0.236553		0.0583796
	154		69.4078		157847000		152622000		0.000341997		0.000330677		7.81451e-05
	176		17.0579		21672900000		20947400000		0.0028362		0.00274126		0.00015927
72	99		114.397		19279600		18448300		4.27346e-05		4.0892e-05		0.000108581
	110		109.486		9319570		9537630		8.37403e-05		8.56997e-05		3.01832e-05
	129		76.3952		1929470000		1994110000		0.0118172		0.0122131		0.00297203
	131		76.0116		1113800000000		1106980000000		6.75327		6.71192		1.68991
	134		72.9902		20985500		17115300		8.38044e-05		6.83491e-05		2.01373e-05
	135		72.8275		124678000		114307000		7.13042e-05		6.53732e-05		0.000272668
	141		70.3182		214213000		257970000		0.00079396		0.000956144		0.000183797
	146		69.8544		80053200		74772300		0.000409932		0.00038289		9.42706e-05
	157		69.2965		2427290000		2285520000		0.0122318		0.0115174		0.00279043
	159		69.1826		645278000		679880000		0.00324106		0.00341486		0.000738167
	161		69.1442		150054000		140881000		0.000752846		0.000706824		0.000171369
73	81		1002.77		573259		590625		0.000432087		0.000445176		0.0014264
	83		883.312		408129		402532		0.000334173		0.000329591		0.000971755
	85		862.507		544208		577472		0.000303465		0.000322014		0.000861671
	95		712.144		1823570		1720090		0.000954694		0.00090052		0.00221989
	101		113.362		63333		209559		6.10069e-07		2.01863e-06		2.27675e-07
	110		109.496		243136000		50441500		0.00218504		0.000453314		0.00078764
	131		76.016		55085200000		54547200000		0.334035		0.330772		0.0835925
	134		72.9943		987088		845024		3.94232e-06		3.37493e-06		9.47352e-07
	146		69.8581		619808		616915		3.17422e-06		3.1594e-06		7.30002e-07
	157		69.3002		136721000		125991000		0.000689048		0.000634973		0.000157201
	159		69.1863		7165420		8347400		3.59938e-05		4.19312e-05		8.1982e-06
	161		69.1479		23170500		29186700		0.000116263		0.00014645		2.64661e-05
74	95		734.939		2283650		2051430		0.00127311		0.00114365		0.00305481
	131		76.27		42738800000		42607000000		0.260901		0.260097		0.0655089
	153		69.6439		52825200		58824700		0.000192055		0.000213867		4.40331e-05
	157		69.5112		126926000		125587000		0.000643583		0.000636795		0.000147275
	159		69.3966		77385400		84792600		0.000391094		0.000428529		8.93491e-05
	161		69.358		627298000		604689000		0.00316674		0.0030526		0.000723069
75	76		2035.96		51400000		54000000		0.101		0.106109		0.675
	79		1636.71		26600000		26700000		0.0321		0.0322207		0.173
	105		110.667		1803570000		1966690000		0.00603224		0.00657781		0.0180547
	127		76.8303		1602070000		1646370000		0.00179294		0.00184253		0.00728469
	136		71.7385		50728000000		52246600000		0.0462161		0.0475997		0.201549
	137		71.724		137000000000		148000000000		0.342		0.36946		0.0807
	138		71.406		43000000000		47000000000		0.108		0.118047		0.0253
	140		71.0808		144968000000		149116000000		0.128475		0.132151		0.564737
	147		70.0026		784477000		806147000		0.000664067		0.000682411		0.00296115
	151		69.7377		508341000		417699000		0.000425448		0.000349587		0.00152271
	154		69.684		684000000		679000000		0.00148		0.00146918		0.00034
	171		17.2541		12700700000		15649200000		0.000160987		0.000198361		0.00349216
76	125		80.031		3030000000		3440000000		0.0099		0.0112396		0.00261
	134		75.854		54400000000		59200000000		0.153		0.1665		0.0383
	143		72.809		83700000000		85300000000		0.203		0.206881		0.0488
	149		72.327		96000000000		93100000000		0.0753		0.073		0.0179
	152		72.19		113000000000		111000000000		0.26		0.255398		0.0618
	167		17.793		4120000		465000000		1.96e-07		2.21e-05		1.15e-08
	168		17.788		975000000		926000000		0.000132		0.000125366		7.72e-06
77	110		117.075		24723000		29620200		0.000254008		0.000304323		9.78997e-05
	111		116.282		212705000		243059000		0.0030182		0.00344891		0.0011554
	112		115.76		316808000		275071000		0.00445513		0.0038682		0.00169781
	122		81.0797		919860000		799154000		0.00453277		0.00393797		0.00120989
	129		80.014		1831810000		1878200000		0.0123072		0.0126189		0.00324186
	131		79.5933		680145000		672416000		0.00452168		0.0044703		0.00118481
	134		76.2867		74590500000		63727700000		0.325386		0.277999		0.0817181
	135		76.1089		24229800000		29800600000		0.0158159		0.0194523		0.0776362
	141		73.3727		87186800000		84206500000		0.351834		0.339807		0.0849851
	143		73.0445		83058800000		82692100000		0.0479278		0.0477162		0.19843
	146		72.8678		278369000000		274551000000		1.5511		1.52983		0.372087
	152		72.4212		287323000		189393000		0.000161587		0.000106513		0.00044675
	157		72.261		497502000		495824000		0.00272614		0.00271695		0.000648519
	159		72.1371		35338100000		35709500000		0.192977		0.195005		0.0458285
	161		72.0954		6286910000		6300610000		0.0342924		0.0343671		0.00813911
	168		17.8017		89041600		100647000		7.43733e-07		8.40671e-07		1.43448e-05
78	110		118.109		1958770		2341850		2.04818e-05		2.44875e-05		7.96386e-06
	111		117.302		48817000		58675200		0.000704904		0.000847253		0.000272212
	112		116.771		824874		834355		1.18034e-05		1.1939e-05		4.53745e-06
	129		80.4958		96396800		91164900		0.000655473		0.000619897		0.000173699
	131		80.07		17652500		17117600		0.000118766		0.000115167		3.13064e-05
	134		76.7245		115457000000		101265000000		0.509455		0.446832		0.12868
	140		73.7776		2803880000		2621250000		0.01144		0.0106949		0.00277857
	144		73.3656		28309800000		29711900000		0.114219		0.119876		0.0275868
	146		73.2671		134086000000		133154000000		0.755349		0.7501		0.182191
	157		72.6537		14583200		14050600		8.07819e-05		7.78314e-05		1.93216e-05
	159		72.5285		6215430000		6174340000		0.0343111		0.0340842		0.00819244
	161		72.4863		423104000		423444000		0.00233294		0.00233482		0.000556712
	180		17.1006		4027100		4800140		8.82738e-07		1.05219e-06		4.96951e-08
79	122		81.5799		33286200		37089500		0.000166053		0.000185027		4.45966e-05
	124		80.9725		278655000		235655000		0.00136949		0.00115816		0.000365064
	134		76.549		11700000000		12700000000		0.0333		0.0361462		0.0084
	141		73.7821		18326000000		17906800000		0.0747803		0.0730696		0.0181639
	143		73.45		217000000000		220000000000		0.533		0.540369		0.129
	144		73.37		170682000000		169300000000		0.688718		0.683145		0.166353
	149		72.959		339000000000		334000000000		0.271		0.267		0.065
	152		72.82		60900000000		60800000000		0.145		0.144762		0.0348
	153		72.803		1674930		1724470		6.65446e-06		6.85127e-06		1.5949e-06
	170		17.454		575000000		550000000		7.53e-05		7.20261e-05		4.33e-06
80	101		125.536		10598300		13134000		0.000125196		0.000155151		5.17405e-05
	110		120.813		889853		1072290		9.73556e-06		1.17316e-05		3.87207e-06
	111		119.968		37717700		40006000		0.000569673		0.000604235		0.00022499
	112		119.413		808804000		706931000		0.012103		0.0105786		0.0047579
	131		81.3034		514817000		504727000		0.00357121		0.00350122		0.000955861
	134		77.8562		29759100000		25060800000		0.135215		0.113867		0.0346567
	135		77.671		101972000000		126399000000		0.0707453		0.0876919		0.342949
	141		74.8235		32919500000		30688100000		0.138149		0.128784		0.0340295
	146		74.2985		16237900000		15694600000		0.0940669		0.0909195		0.0230084
	157		73.6677		4686620000		4644260000		0.0266907		0.0264495		0.00647303
	159		73.539		337169000000		335847000000		1.9135		1.906		0.463252
	161		73.4956		44699900000		44458600000		0.253382		0.252014		0.0613067
81	120		84.7639		777703000		676296000		0.00399856		0.00347718		0.00109021
	121		84.6251		48631300000		37196600000		0.129401		0.0989746		0.0327668
	136		76.934		9060000000		6560000000		0.00804		0.00582		0.0102
	137		76.5521		5341860000		4278940000		0.0140791		0.0112777		0.00354816
	154		74.5762		5120070000		5300350000		0.0128069		0.0132579		0.00314425
82	99		131.066		93600000		93100000		0.000723		0.000719		0.000312
	134		79.244		51200000000		35300000000		0.145		0.0998		0.0377
	143		75.927		3650000000		3470000000		0.00947		0.00901		0.00237
	152		75.254		231000000000		218000000000		0.589		0.554		0.146
83	113		124.258		5568100		6192090		8.90145e-05		9.89899e-05		3.61689e-05
	128		84.0229		553552000		511744000		0.00406402		0.00375708		0.00111906
	130		83.8638		48379100		48986000		0.000353832		0.000358271		9.72444e-05
	150		75.7294		106123000000		104991000000		0.633483		0.626725		0.157288
	156		75.5357		113989000000		112456000000		0.676908		0.667805		0.167633
	174		17.468		441326000		421197000		0.000141045		0.000134612		8.10315e-06
84	127		85.0139		90211600		74312100		0.000131254		0.000108121		0.000391668
	136		78.8252		7768410000		10180000000		0.00903594		0.011841		0.0462169
	147		76.7324		363786000000		367573000000		0.390751		0.394819		1.58248
	151		76.4155		42321600000		42359400000		0.0449024		0.0449424		0.180876
	154		76.3497		338000000000		342000000000		0.875		0.885355		0.217
85	91		8156.86		40517		42628		0.00281436		0.00296099		0.0753786
	118		86.848		131637000		100559000		0.000435839		0.000332942		0.000123108
	120		85.945		39761100		33134100		0.000210036		0.000175029		5.80461e-05
	138		77.5192		43503100000		43131700000		0.111496		0.110544		0.0277085
88	137		78.261		4500000000		5500000000		0.0124		0.0151		0.00319
	138		77.883		9340000000		11800000000		0.0255		0.0322		0.00653
	154		75.839		340000000000		339000000000		0.88		0.876		0.22
89	129		84.6013		45208000		40035100		0.000339559		0.000300705		9.45721e-05
	131		84.1311		2597660000		2672980000		0.0192948		0.0198543		0.00534402
	157		75.9817		962350000000		955458000000		5.83038		5.78862		1.4584
	159		75.8448		1470960000		1395820000		0.0088797		0.0084261		0.00221715
	161		75.7986		5558050000		5511960000		0.0335113		0.0332334		0.00836225
91	146		76.7324		142658000		136133000		0.00106203		0.00101346		0.00029448
	153		76.2181		6135140000		5920340000		0.0267152		0.0257799		0.00670328
	157		76.0592		165521000000		165405000000		1.00485		1.00415		0.251609
	161		75.8758		276040000		304923000		0.00166772		0.00184223		0.00041658
	179		17.2001		34914700		46305300		1.08397e-05		1.4376e-05		6.13788e-07
92	131		84.7497		104980000		105779000		0.000791279		0.000797298		0.000220769
	157		76.4859		54792300000		54636400000		0.336379		0.335422		0.0846995
	159		76.3472		17451700000		15402000000		0.106751		0.0942127		0.0268308
	161		76.3004		133555000000		134393000000		0.815945		0.821061		0.204955
93	124		85.8788		1606600		1861980		8.88174e-06		1.02935e-05		2.51104e-06
	125		85.691		13300000		14300000		4.72e-05		5.07489e-05		1.33e-05
	141		77.8339		418695000		327235000		0.00190131		0.00148599		0.000487182
	149		76.918		12200000000		22100000000		0.0108		0.0196		0.00273
	153		76.7451		917319000000		913807000000		4.04985		4.03435		1.0232
	168		18.053		148000000		195000000		2.86e-05		3.76824e-05		1.7e-06
	180		17.3097		18091000		16117100		4.0631e-06		3.61977e-06		2.31535e-07
94	102		134.057		56501300		70527400		0.000201541		0.000251572		0.000570038
	129		85.4122		111774000		103330000		0.000855705		0.000791061		0.000240611
	131		84.9329		398262000		408022000		0.00301486		0.00308874		0.000842974
	135		80.9769		121925000		152201000		9.58555e-05		0.000119658		0.000448858
	146		77.318		938701000		761788000		0.0058889		0.00477904		0.00149894
	157		76.6351		18979200000		18761900000		0.116972		0.115633		0.0295107
	159		76.4958		91298500000		91159400000		0.560642		0.559788		0.141187
	161		76.4489		954043000000		945842000000		5.85135		5.80105		1.47264
95	113		127.904		838381		962761		1.43931e-05		1.65284e-05		6.06051e-06
	127		85.7109		4127130000		4268150000		0.00641275		0.00663187		0.0235033
	128		85.6753		1166380000		1088570000		0.00898458		0.00838518		0.0025341
	130		85.5079		1130530000		1053910000		0.00867443		0.00808651		0.00244185
	136		79.4222		98614600		121454000		0.000121915		0.00015015		0.000574266
	140		78.6168		3195130000		3873150000		0.0038311		0.00464408		0.0179437
	147		77.3		78054000000		79491000000		0.0889656		0.0906036		0.356037
	150		77.0696		27798300000		27001300000		0.173273		0.168305		0.0439626
	151		76.9771		517225000000		521546000000		0.582174		0.587038		2.31651
	154		76.912		3510000000		3470000000		0.00923		0.00912481		0.00234
	156		76.8651		61722600000		60545800000		0.382691		0.375395		0.0968386
	171		17.6651		1820300000		2186130000		2.47618e-05		2.97382e-05		0.00051136
	174		17.5381		188976000		155479000		6.09978e-05		5.01858e-05		3.52182e-06
99	103		4170.84		12653200		16573000		2.26549		2.9673		0.216106
	104		3791.57		42800000		44300000		0.195		0.201834		2.01
	120		246.66		104206000		132118000		0.003859		0.00489264		0.00602525
	127		230.901		21151500		19875700		0.000642552		0.000603796		0.000794315
	136		190.307		3264760000		3776450000		0.0555272		0.0642301		0.102521
	140		185.748		14957200		5369690		0.000236543		8.49195e-05		0.000138872
	147		178.561		84497900		78903600		0.00118712		0.00110852		0.00188576
100	118		257.851		474000000		550000000		0.0142		0.0164		0.012
	137		192.241		1590000000		1880000000		0.0264		0.0313		0.0167
	138		189.973		796000000		1050000000		0.0129		0.017		0.00808
	154		178.253		86200000		70100000		0.00123		0.001		0.000723
101	103		6293.62		1727560		1605540		0.0511181		0.0475074		1.05732
	104		5461.86		102628000		88101300		0.480851		0.412789		3.95772
	121		250.423		285361000		228293000		0.0047889		0.00383121		0.00304539
	136		193.272		1927540000		1602330000		0.0513772		0.0427088		0.0318945
	176		20.0798		213942000		242542000		3.87957e-05		4.3982e-05		2.56457e-06
102	104		6107.6		17600000		17900000		0.0457		0.046479		0.359
	120		252.893		396532000		472681000		0.0158262		0.0188654		0.0226599
	151		180.029		212894000		203469000		0.00306532		0.00292961		0.00494309
	154		179.672		10800000		9390000		0.000136		0.000118244		8.06e-05
103	129		243.394		327030000		276517000		0.0203308		0.0171905		0.0162905
	131		239.543		4060170		3449070		0.000244487		0.000207689		0.000192801
	157		183.504		5741440		4660050		0.000202888		0.000164674		0.000122567
	159		182.707		82694700		108571000		0.00289691		0.00380339		0.00174246
	161		182.44		43212700		44777500		0.00150937		0.00156403		0.000906539
104	116		291.728		943000000		1140000000		0.0319		0.0385642		0.0262
	117		287.001		1130000000		1710000000		0.0102		0.0155		0.00826
	134		212.995		1140000000		1220000000		0.0195		0.0208684		0.0121
105	116		299.399		38104900		31000700		0.00151416		0.00123186		0.0012498
	129		250.183		324508000		371403000		0.0213151		0.0243954		0.0175556
	135		215.595		116600000		99147600		0.00173002		0.00147108		0.00207266
106	122		255.082		689561000		660813000		0.0336317		0.0322296		0.0282422
	124		249.236		183971		186437		8.56622e-06		8.68106e-06		7.02864e-06
	141		191.725		1236600000		1124630000		0.0340723		0.0309874		0.0215055
	144		188.967		820985000		616784000		0.0219747		0.016509		0.0136704
	153		185.251		16978300		16019400		0.000436749		0.000412082		0.000266356
107	179		19.8695		32271200		36369800		1.33701e-05		1.50682e-05		8.74569e-07
110	136		205.651		6192890		7538980		0.000196323		0.000238997		0.000132915
	139		201.864		320418		319798		0.000249111		1.36754e-05		0.000705874
	140		200.337		7476180		6534640		0.000224915		0.00019659		0.000148337
	172		20.3496		4689540000		3619440000		0.000873394		0.000674096		5.85108e-05
111	128		256.624		549390000		680142000		0.0379682		0.0470045		0.0320765
112	128		259.202		217897000		203093000		0.015363		0.0143192		0.0131095
	130		257.677		312132000		314903000		0.0217488		0.0219419		0.0184494
	139		205.896		1368970		1163580		6.09028e-05		5.17653e-05		4.12816e-05
116	118		4132.81		13500000		14400000		0.11		0.117333		1.5
	120		2755.63		74063000		79152300		3.82431		4.0871		0.45053
	121		2615.28		22500000		28500000		0.0878		0.111213		0.756
	147		523.819		1115430		1362840		0.000395618		0.000483368		0.000280302
	172		21.814		164000000		157000000		3.37e-05		3.22616e-05		2.42e-06
117	154		521.441		4100000		5560000		0.000501		0.00068		0.00086
118	122		3996.22		23049600		18186400		0.275918		0.217702		3.62994
	124		2922.45		312.761		278.404		2.00228e-06		1.78233e-06		1.92638e-05
120	179		21.447		14005200		11695600		6.76032e-06		5.64547e-06		4.77314e-07
125	154		733.063		315000		383000		9.25e-05		0.000112468		0.000223
	172		22.108		139000000		130000000		2.85e-05		2.66547e-05		2.08e-06
127	134		1593.63		32605100		32778300		0.279516		0.281001		3.11192
131	139		1073.55		1166.14		1023.68		1.4104e-06		1.23811e-06		4.98468e-06
134	136		3378.32		22600000		22000000		0.138		0.134336		1.69
	138		2773.7		15300000		12600000		0.0522		0.0429882		0.521
	140		2354.68		34905900		32331300		0.145071		0.13437		1.12456
	156		1377.59		1244100		1634410		0.0309731		0.00325494		0.496647
	172		22.45		73100000		72900000		1.65e-05		1.64549e-05		1.22e-06
135	140		2537.65		58619200		76901100		2.36388		3.10111		0.371206
	151		1503.73		12308.1		13611.7		0.000103272		0.000114211		2.3071e-05
137	143		3528.8		7960000		8680000		0.0486		0.052996		0.565
	168		23.382		124000000		102000000		2.51e-05		2.06468e-05		1.93e-06
138	141		6247.76		459040		386328		0.0134313		0.0113038		0.276257
	143		4518.69		8430000		9930000		0.0912		0.107428		1.36
140	143		6363.02		218636		222253		0.0833974		0.0847769		0.0040471
	152		3636.69		234676		1365300		0.0167119		0.0972268		0.00812099
152	176		22.613		43600000		57200000		1.31e-05		1.71862e-05		9.79e-07
153	176		22.615		583028000		505406000		0.000133456		0.000115688		9.9117e-06
154	178		22.3532		6087660		6744080		0.00179077		0.00198387		0.00476784
156	178		22.3625		53235.3		60687.2		1.99551e-08		2.50528e-08		1.46907e-09
167	172		655.182		254000000		209000000		0.0489		0.0404		0.106
	176		533.321		751000000		683000000		0.0961		0.0874		0.169
168	172		663.05		166000000		155000000		0.0306		0.0285723		0.0667
	176		538.524		444000000		480000000		0.0626		0.0676757		0.111
172	180		823.268		72874000		84253400		0.0722145		0.0834909		0.273346
174	179		1013.35		38969500		32745600		0.041994		0.035287		0.140093
176	180		1154.41		42838.6		47583.2		0.000118308		0.000131411		0.000747595
